## Research Article

### **Cytotoxic Activity of CD4 T Cells During the Early Stage of Autoimmune Neuroinflammation**

Fernando Pradella<sup>1,2,3†</sup>, Vinicius O. Boldrini<sup>1,2,3†</sup>, Ana Maria Marques<sup>1†</sup>, Guilherme A. D. Morais<sup>1</sup>, Carolina Francelin<sup>1,3#</sup>, Rani S. Cocenza<sup>1</sup>, Vitor C. Lima<sup>1</sup>, Maurilio Bonora-Jr.<sup>1</sup>, Natalia S. Brunetti<sup>1</sup>, Bruna B. Campos<sup>1</sup>, Evelise S. M. Fonseca<sup>1</sup>, Michelle Rocha-Parise<sup>1</sup>, Carla R. V. Stella<sup>2</sup>, Alfredo Damasceno<sup>4</sup>, Felipe von Glehn<sup>2,4,5</sup>, Ana Leda F. Longhini<sup>1,2,6</sup>, Leonilda M. B. Santos<sup>2,3</sup>, Alessandro S. Farias<sup>1,3,7\*</sup>

<sup>1</sup>Autoimmune Research Laboratory - Department of Genetics, Microbiology and Immunology - Institute of Biology, University of Campinas, Campinas, Brazil.

<sup>2</sup>Neuroimmunology Unit - Department of Genetics, Microbiology and Immunology - Institute of Biology, University of Campinas, Campinas, Brazil.

<sup>3</sup>National Institute of Science and Technology on Neuroimmunomodulation (INCT-NIM) – Oswaldo Cruz Institute, Oswaldo Cruz Foundation, Rio de Janeiro, Brazil.

<sup>4</sup>Departament of Neurology – School of Medical Sciences, University of Campinas, Campinas, Brazil.

<sup>5</sup>Ann Romney Center for Neurologic Diseases, Department of Neurology, Brigham and Women's Hospital, Harvard Medical School, Boston, USA.

<sup>6</sup>Department of Immunology and Rheumatology - University of Alabama at Birmingham, Birmingham, USA.

<sup>7</sup>Experimental Medicine Research Cluster (EMRC), Campinas, Brazil.

#*current address*: Department of ophthalmology, University of Alabama at Birmingham, USA.

†These authors contributed equally to this work

\*For *correspondence*: [asfarias@unicamp.br](mailto:asfarias@unicamp.br)

**Keywords:** Cytotoxic CD4+ T cells, Autoimmunity, Multiple Sclerosis

Abstract: **146**

Main text: **4,128**

Figures: **6**

Tables: **1**

Supplementary figures: **3**

1 **Abstract**

2 Pathogenic CD4<sup>+</sup> T cells are capable of initiating neuroinflammation in experimental  
3 autoimmune encephalomyelitis (EAE). However, the precise effector mechanism of these  
4 autoaggressive CD4<sup>+</sup> T cells is not entirely elucidated. Here, we demonstrated that  
5 pathogenic CD4<sup>+</sup> T cells, upon autoantigen stimulation, developed a cytotoxic phenotype at  
6 the onset of EAE. The cytotoxic activity of pathogenic CD4<sup>+</sup> T cells was sufficient to explain  
7 the initial myelin lesion. Consistently, CD4<sup>+</sup> T cells of peripheral blood (PBMCs) and  
8 cerebrospinal fluid (CSF) from relapse-remitting multiple sclerosis (RRMS) patients present an  
9 enhancement of the cytotoxic profile in comparison with healthy control (HC). Moreover,  
10 cytotoxic CD4<sup>+</sup> T cells (CD4-CTLs) are restrained in the PBMCs of Natalizumab-treated RRMS  
11 patients. Mechanistically, autoaggressive CD4-CTLs matched the majority of the molecular  
12 pathways of effector CD8<sup>+</sup> T cells. Altogether, our findings point to potential new targets for  
13 monitoring MS diagnosis, treatment, and the development of novel therapeutic avenues.

## 14 **Introduction**

15 Experimental autoimmune encephalomyelitis (EAE) is a widely accepted animal model of  
16 multiple sclerosis (MS). EAE shares many pathophysiological features with MS, such as chronic  
17 neuroinflammation, demyelination, neuronal damage, and is generated by the autoimmune  
18 attack on the central nervous system (CNS) (Baxter, 2007; Steinman and Zamvil, 2006). The  
19 disease can be induced in susceptible animals by active immunization with self-epitopes of  
20 myelin or by the passive transfer of pre-activated lymphocytes (Paterson, 1960; Rivers et al.,  
21 1933). More specifically, EAE can be induced by the adoptive transfer of CD4+ T cells specific  
22 to the neuroantigen (Ben-Nun et al., 1981; Flugel et al., 1999; Schluesener and Wekerle,  
23 1985). Even though the inflammatory activity of these cells is well known, the mechanisms by  
24 which encephalitogenic CD4+ T cells initiate tissue lesions are not entirely elucidated (Glatigny  
25 and Bettelli, 2018; Wagner et al., 2019). It is not clear if these cells are capable of promoting  
26 direct cytolytic activity over the target tissue or if they affect the target tissue by creating an  
27 inflammatory milieu allowing other leucocytes entry in the CNS to exert their effector  
28 function.

29 Although CD8+ T cells do not imply the onset of EAE (Jiang et al., 1992; Koh et al., 1992;  
30 Saligrama et al., 2019), the blockage or deletion of cytotoxic-related molecules, especially  
31 transcription factors, results in a minor or delayed onset of the disease (Aqel et al., 2018;  
32 Martinez Gomez et al., 2012; Nohara et al., 2001; Y. Wang et al., 2014). Although it is not  
33 particularly new (Irle et al., 1984; Ozdemirli et al., 1992; Wagner et al., 1975; 1977), a growing  
34 body of evidence supports the cytotoxic activity of CD4+ T cells during chronic viral infections,  
35 tumor-specific immune response, and allograft rejection (Caielli et al., 2019; Fleischhauer et  
36 al., 2001; Quezada et al., 2010; Serroukh et al., 2018; Ślędzińska et al., 2020; Wilkinson et al.,  
37 2012).

38 In 2007, Kebir and colleagues showed that the cytotoxic activity of encephalitogenic CD4+ T  
39 cells in the EAE model is essential for breaching the blood-brain barrier (Kebir et al., 2007).  
40 Furthermore, treating EAE with Serpina3n, a granzyme B (GzmB)-inhibitor, resulted in a  
41 significant reduction of EAE severity, although infiltration of T cells into the CNS was not  
42 reduced (Haile et al., 2015). Recent studies indicate a role of cytotoxic CD4+ T cells (CD4-CTLs)  
43 during the course of RRMS as well (Beltrán et al., 2019; Kebir et al., 2007; Peeters et al., 2017;  
44 Schafflick et al., 2020; Zaguia et al., 2013).

45 In this context, we investigated the role of CD4-CTLs during the early phase of autoimmune  
46 neuroinflammation. We reported that during the early stage of EAE encephalitogenic CD4+ T  
47 cells build a cytotoxic profile, which is enhanced after these cells reach the CNS. These  
48 encephalitogenic CD4-CTLs alone were capable of initiating CNS damage in a healthy CNS  
49 tissue. Moreover, our results in the experimental model were consistently replicated in CD4+  
50 T cells of peripheral blood (PBMCs) and cerebrospinal fluid (CSF) from RRMS patients. The  
51 enhancement of CD4-CTLs presented potential implications for the diagnosis and treatment  
52 of RRMS.

## 53 Results

### 54 Enhancement of the cytotoxic activity of encephalitogenic CD4+ T during EAE

55 In order to evaluate the cytotoxic profile of encephalitogenic CD4+ T cells, we sorted  
56 CD3+CD4+ cells from lymph nodes (LN) and central nervous system (CNS) of mice immunized  
57 with neuroantigen (MOG<sub>35-55</sub>), or with non-self-antigen [ovalbumin (OVA)]. Then, we analyzed  
58 the expression of classical proinflammatory and cytotoxic-related molecules by qPCR. In  
59 general, CD4+ T cells sorted from MOG<sub>35-55</sub>-immunized mice presented a significantly higher  
60 expression of cytotoxic-related molecules in comparison with OVA-immunized animals either  
61 on the LN or CNS (**Fig. 1A**).

62 Interestingly, cluster analysis demonstrated that CNS infiltrating CD4+ T cells present an  
63 enhancement of the cytotoxic profile (**Fig. 1B**). These data were corroborated by flow  
64 cytometry (**Fig. 1C**). Nevertheless, the expression of the majority of cytotoxic-related  
65 molecules by CD4+ T cells sorted from LN of mice immunized with MOG<sub>35-55</sub> is significantly  
66 higher in comparison with CD4+ T cells sorted from LN of mice immunized with OVA (**Fig.**  
67 **S1A**). These results revealed that CD4+ T cells built a cytotoxic profile during the evolution of  
68 EAE upon autoantigen stimulation, which is enhanced after the cells reach the CNS.

69 Although it is clear that these cells exhibit a cytotoxic profile during the evolution of the  
70 disease, this does not necessarily mean that they have cytotoxic activity in the target organ.  
71 Thus, intending to evaluate the cytotoxic effector activity of encephalitogenic CD4+ T cells,  
72 we incubated acute brain slices with sorted CD3+CD4+ T cells from the CNS of MOG<sub>35-55</sub>-  
73 immunized mice 13 days after immunization (d.a.i.), or CD3+CD4+ T cells from the spleen of  
74 unimmunized animals (controls) and evaluated the presence of activated caspase-3, which is  
75 directly cleaved by GzmB (Goping et al., 2003) (**Fig. 1D**). Our results demonstrated that

76 encephalitogenic CD4+ T cells alone are capable of promoting a direct cytotoxic activity over  
77 CNS tissue (**Fig. 1E**).

78

### 79 **Cytokine profile of cytotoxic CD4+ T cells after reach the CNS**

80 Next, we explored the mechanisms by which these cells become cytotoxic and how important  
81 they are for the development of the autoaggressive response. Some studies have shown that  
82 CD4-CTLs is associated with a Th1 profile (Ozdemirli et al., 1992; Serroukh et al., 2018; Sun  
83 and Wekerle, 1986). In contrast, Kebir and colleagues demonstrated that CD4-CTLs present a  
84 Th17 profile in the EAE model (Kebir et al., 2007). Our qPCR analysis showed an increased  
85 expression of T-bet and IFN $\gamma$  by CD4+ T cells after reach the CNS (**Fig. 1F**). No significant  
86 difference was found in the expression of ROR $\gamma$ t of IL-17A (**Fig. 1F**). Then, we used IL-17A<sup>YFP</sup>  
87 or IFN $\gamma$ <sup>GFP</sup> reporter mice to evaluate the expression levels of cytotoxic-related molecules in  
88 sorted CD4+IL-17a+ or CD4+IFN $\gamma$ + T cells after these cells reached the CNS in EAE model (**Fig.**  
89 **1G**). The expression of the majority of the cytotoxic-related molecules was significantly higher  
90 in CD4+ IFN $\gamma$ -producing T cells about CD4+ IL-17A-producing cells (**Fig. 1H**).

91 Thus, our data agree with the majority of the literature, which demonstrated a prevalence of  
92 Th1-like profile by CD4-CTLs. Nevertheless, Th17 encephalitogenic cells turn to IFN $\gamma$ -  
93 producing cells after entry into the CNS (Hirota et al., 2011; Y. Wang et al., 2014). Therefore,  
94 cytotoxic IFN $\gamma$ -producing CD4+ T cells inside the CNS and cytotoxic Th17 in the periphery  
95 might represent the same population in different effector stages. Interestingly, the  
96 development of IFN $\gamma$ -producing Th17 cells required the expression of T-bet and Runx1 or  
97 Runx3 (Y. Wang et al., 2014).

98

Figure 1

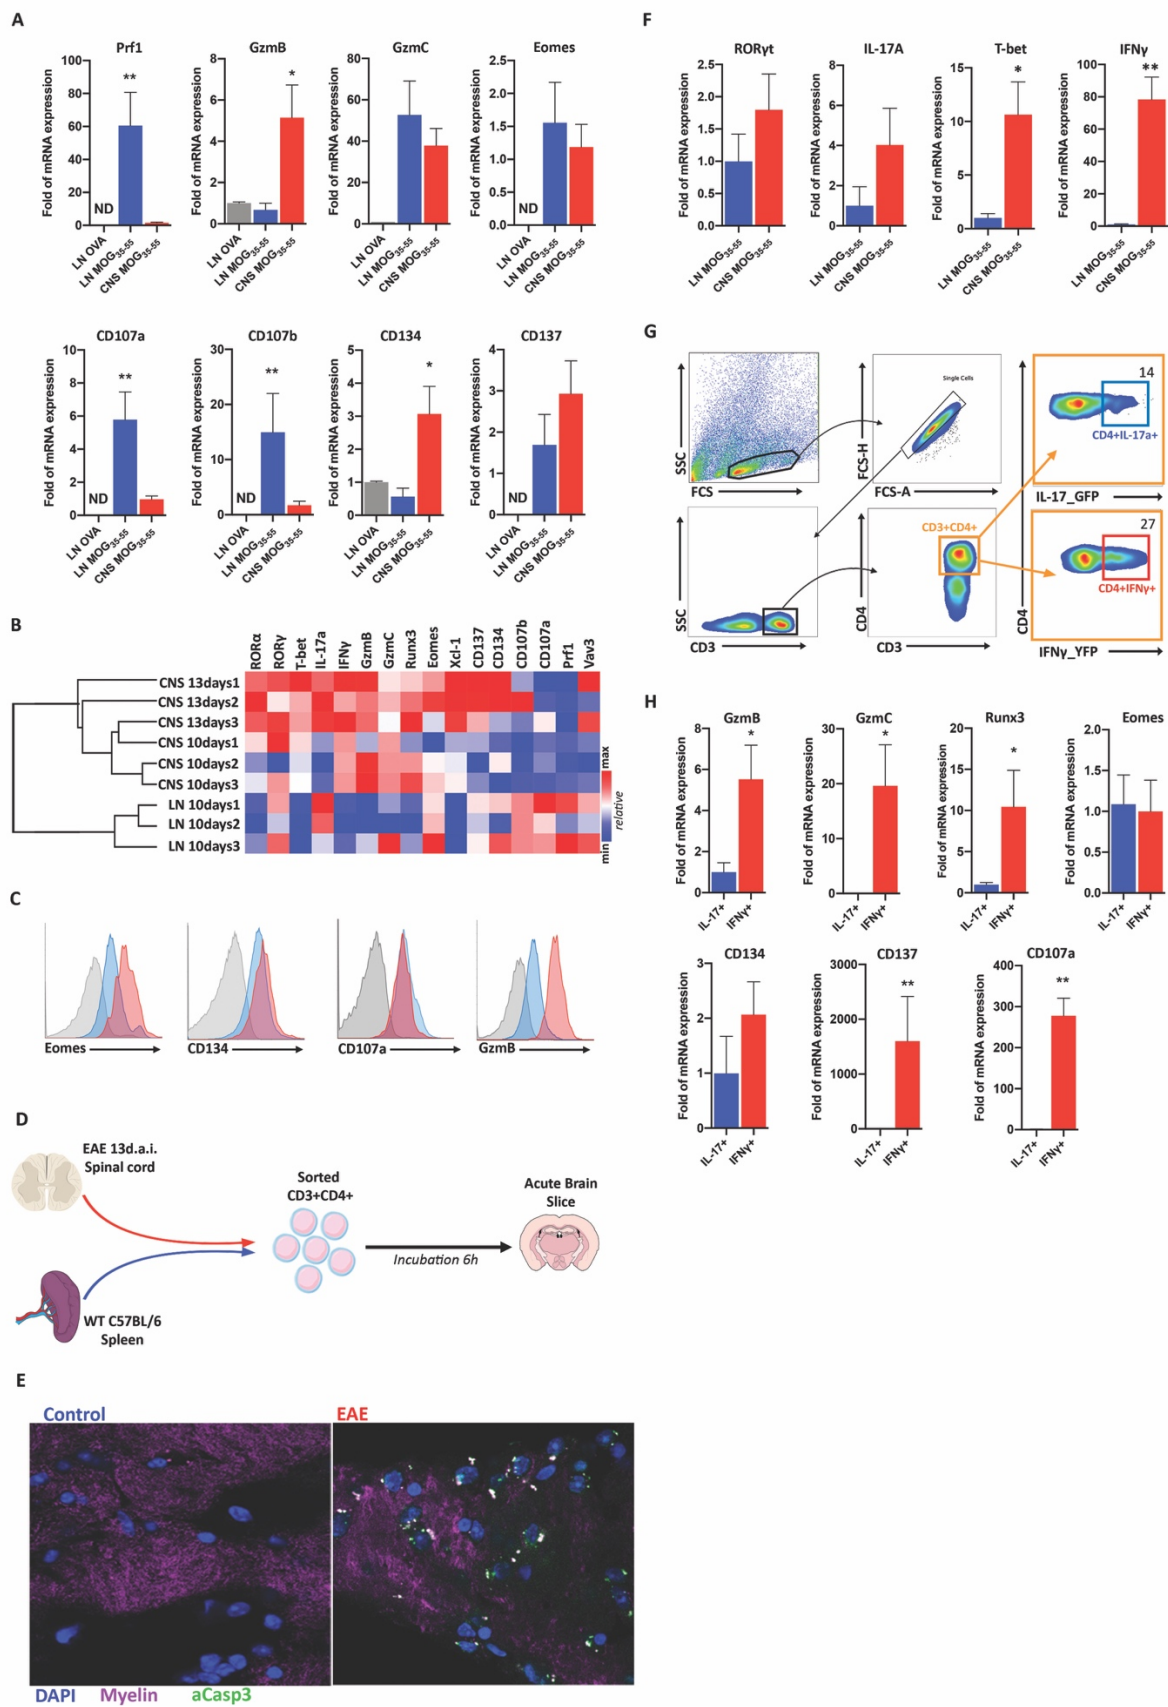

100 **Figure 1 – Cytotoxic activity of CD4+ T cells during the clinical evolution of EAE.**

101 **(A)** mRNA expression of cytotoxic-related molecules in CD4+ cells sorted from the lymph  
102 nodes (LN) of OVA-immunized 10 d.a.i. (gray), LN of MOG<sub>35-55</sub>-Immunized mice; 10 d.a.i. (Blue)  
103 or CNS of MOG<sub>35-55</sub>-Immunized mice; 10-13 d.a.i. (red) (*n*=3-9). **(B)** Hierarchic cluster analysis  
104 of cytotoxic (Eomes, Runx3, GzmB, GzmC, Prf1, CD107a, CD107b, CD134, CD137 and VAV3)  
105 and inflammation-related molecules (T-bet, ROR $\alpha$ , ROR $\gamma$ t, IFN $\gamma$ , IL-17a and XCL-1) in sorted  
106 CD4+ T cells during the evolution (lymph nodes 10 d.a.i. (LN10days), spinal cord 10 d.a.i.  
107 (CNS10days) and spinal cord 13 d.a.i. (CNS13days)) of EAE. **(C)** Representative flow cytometry  
108 analysis of Eomes, CD134, CD107a and GzmB of CD4+ T cells from CNS (red) at 10-13 d.a.i.  
109 and lymph nodes (blue) at 10 d.a.i. of EAE and isotype control (gray) (*n*=5) **(D)** Experimental  
110 design of acute slice incubation. **(E)** Confocal microscopy (63x) of a brain slice after incubation  
111 with CD4+ T cells from the spleen of unimmunized animals (left panel) or CD4+ cells sorted  
112 from the spinal cord 13 d.a.i. (right panel) (*n*=9). **(F)** mRNA expression of T-bet, IFN $\gamma$ , ROR $\gamma$ t,  
113 and IL-17A of CD4+ T cells sorted LN of MOG<sub>35-55</sub>-Immunized mice; 10 d.a.i. (Blue) or CNS of  
114 MOG<sub>35-55</sub>-Immunized mice; 10-13 d.a.i. (red) (*n*=3-9). **(G)** Gate strategy for sorting CD3+CD4+  
115 (orange gate) cells expressing IL-17a (blue gate) or IFN $\gamma$  (red gate). **(H)** mRNA expression of  
116 cytotoxic-related molecules among CD4+IL-17a+ (blue) or CD4+IFN $\gamma$ + (red) cells from CNS 10-  
117 13 d.a.i. (*n*=4-7). Data are represented in mean +/- SEM; \**p*<0.05, \*\**p*<0.01



## 118 **Expression of Runx3 and CD4-CTLs**

119 Runx3 is a crucial transcription factor for T CD8+CD4- lineage differentiation as well as for the  
120 initial cytotoxic program inducing the expression of CTL-lineage associated genes, including  
121 IFN $\gamma$  (Cheroutre and Husain, 2013; Istaces et al., 2019). Therefore, the enhancement of this  
122 transcription factor could explain the cytotoxic activity as well as the Th1-like profile.

123 Thus, we evaluated the expression of Runx3 by encephalitogenic CD4+ T cells, its relation with  
124 the cytotoxic profile, and its importance to the onset of EAE. Our qPCR results demonstrated  
125 a significant enhancement of the expression of Runx3 by encephalitogenic CD4+ T cells as well  
126 as by IFN $\gamma$ -producing CD4+ T cells (**Fig. 1H and 2A**). Therefore, we used Runx3 reporter mice  
127 (Runx3<sup>YFP</sup>) to evaluate the expression of Runx3 by encephalitogenic CD4+ T cells at the protein  
128 level. We observed a significant increase in the expression of Runx3 by CD4+ T cells after reach  
129 the CNS (**Fig. 2B**) as well as an enrichment of CD4+Runx3+ T cells infiltrated in the CNS in  
130 comparison with CD4+ T cells from LN (**Fig. 2C and 2D**). Also, the expression levels of Gzmb  
131 was significantly higher in CD4+Runx3+ cells compared to CD4+Runx3- cells infiltrated into  
132 the CNS (**Fig. 2E**).

133 Next, to evaluate the importance of Runx3 by encephalitogenic CD4-CTLs pathogenicity  
134 during the onset of EAE, we generated Runx3 tissue-specific (CD4+ cells) knockout mice  
135 (CD4 $\Delta$ Runx3). Strikingly, the deletion of Runx3 in CD4+ cells diminished the incidence and  
136 severity of EAE (**Fig. 2F**). Moreover, the expression of CD107a by CD4+ T cells in the LN from  
137 CD4 $\Delta$ Runx3 mice were significantly decreased (**Fig. S1B**). These data indicate that the  
138 expression of Runx3 and the cytotoxic activity of CD4+ T cells contribute to the development  
139 of the autoaggressive response in the EAE model, at least during the early stage of the disease.  
140 During T cell development in the thymus, the balance between the expression of Runx3 and  
141 ThPOK is determinant to CD8 or CD4 lineage fate, respectively. In this context, the expression

142 of Runx3 represses ThPOK and terminates CD4 expression as well (Cheroutre and Husain,  
143 2013; Setoguchi et al., 2008). In contrast, our data showed a slight increase in expression of  
144 ThPOK after CD4<sup>+</sup> T cell entry in the CNS (**Fig. 2G**) as well as no regulation of CD4 molecule  
145 expression (**Fig. 2L**). Besides, we observed that almost all of CD4<sup>+</sup>Runx3<sup>+</sup> T cells were also  
146 ThPOK positive (**Fig. 2H and Fig. 2I**). Of note, in the context of human cytomegalovirus  
147 infection, Th1 CD4-CTLs have been found to enhance the expression of Runx3 in the absence  
148 of ThPOK downregulation as well (Serroukh et al., 2018).

149

### 150 **CD4<sup>+</sup> T cells landscape into the CNS**

151 In order to identify the CD4-CTLs infiltrated in the CNS, we used t-distributed stochastic  
152 neighbor embedding (t-SNE) to evaluate the co-expression level of CD4, Runx3, T-bet, GzmB,  
153 VLA-4 (CD49d,  $\alpha 4\beta 1$ ,  $\alpha 4\beta 7$ ), and KLRG1 in CD3<sup>+</sup>CD4<sup>+</sup> T cells population from CNS during the  
154 onset of EAE (**Fig. 2J**). Then, we applied an artificial neural network-based algorithm  
155 (FlowSOM) to generate specific populations based on the expression of those markers (**Fig.**  
156 **2K**). FlowSOM-based nodes were then manually annotated in the CD3<sup>+</sup>CD4<sup>+</sup> t-SNE landscape  
157 (**Fig. 2K**). The CD4-CTLs population was defined by the high expression of Runx3, GzmB, and  
158 T-bet. These data were confirmed by the expression intensity of those markers at the single-  
159 cell level of each annotated population (**Fig. 2L**). Interestingly, the VLA4<sup>hi</sup> population also  
160 present a high expression of GzmB, although it was significantly lower in comparison with  
161 CD4-CTLs (**Fig. 2K and Fig. 2L**). Conventional Th1 (cTh1) population was defined by the high  
162 expression of T-bet and low expression of Runx3, GzmB, VLA-4, and KLRG1 (**Fig. 2K and Fig.**  
163 **2L**). We identified one population that expresses high levels of KLRG1 and low levels of Runx3,  
164 T-bet, GzmB, and VLA-4 (**Fig. 2K and Fig. 2L**). KLRG1 is highly expressed in short-lived effector

165 CD8+ T cells (Hamilton and Jameson, 2007). Moreover, the expression of KLRG-1 is a direct  
 166 consequence of T-bet expression (Joshi et al., 2007).

Figure 2

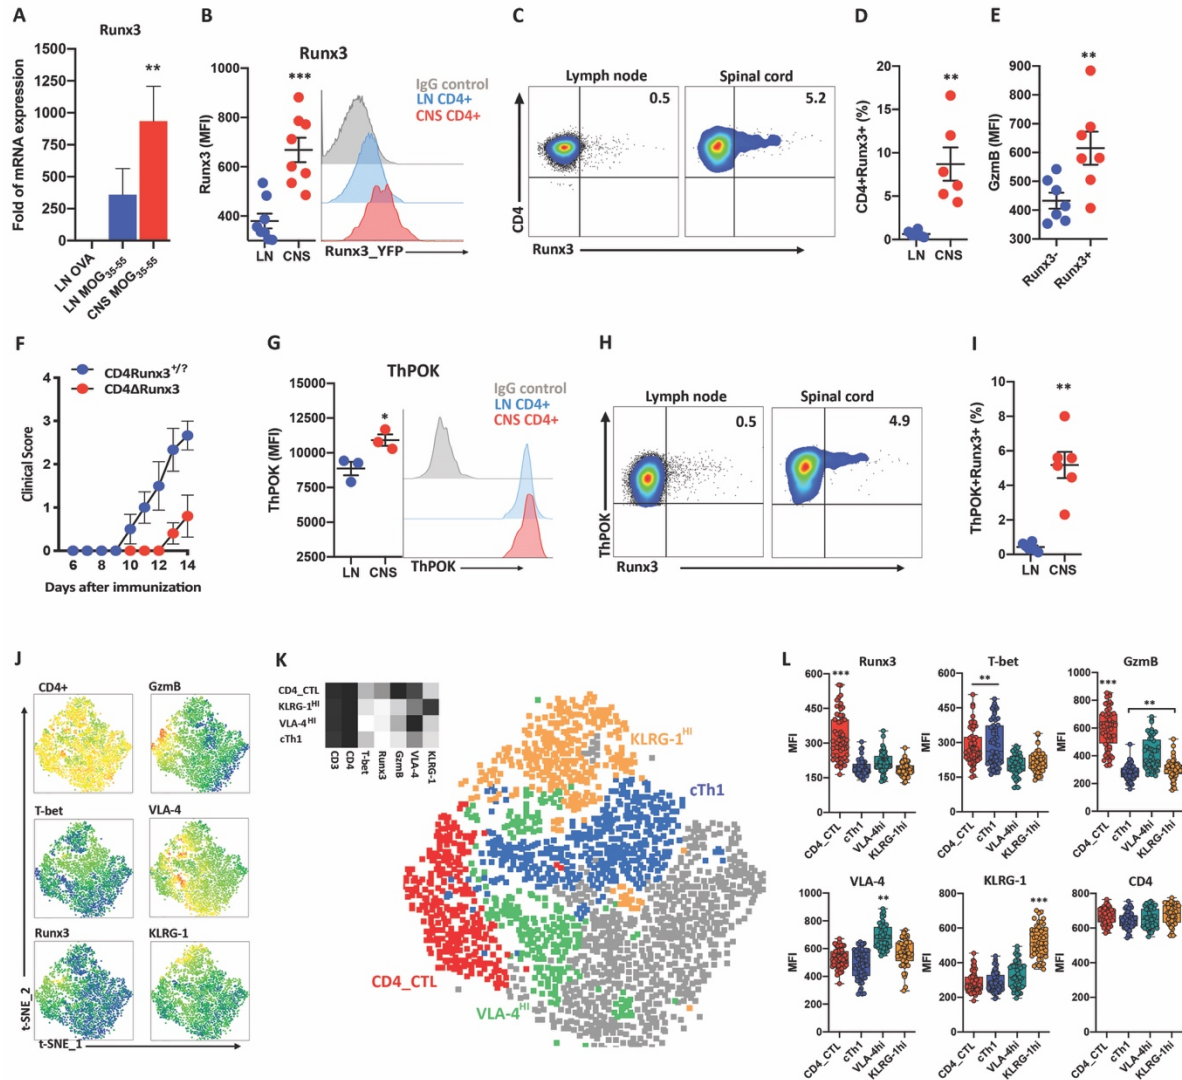

167

168 **Figure 2 – Runx3 expression by CD4+ T cells during the course of EAE.**

169 **(A)** mRNA expression of Runx3 in sorted CD3+CD4+ T cells from OVA-immunized 10 d.a.i.

170 (gray), LN of MOG<sub>35-55</sub>-Immunized mice; 10 d.a.i. (Blue) or CNS of MOG<sub>35-55</sub>-Immunized mice;

171 10-13 d.a.i. (red) ( $n=3-9$ ). **(B)** Runx3 expression (MFI) in CD3+CD4+ cells from LN 10 d.a.i (blue)

172 and CNS 10-13 d.a.i (red). **(C)** Representative flow cytometry analysis of Runx3+ cells among

173 gated CD3+CD4+ cells from LN 10 d.a.i. (left), CNS 10-13 d.a.i. (right) (*representative of n=6*).

174 **(D)** Frequency of Runx3+ cells in gated CD3+CD4+ cells from LN 10 d.a.i. (blue), CNS 10 d.a.i.

175 (red). **(E)** GzmB expression (MFI) in CD3+CD4+Runx3- cells (blue) or CD3+CD4+Runx3+ cells

176 (red). **(F)** Clinical evolution of EAE by CD4Runx3<sup>+/+</sup> mice (blue) or CD4 $\Delta$ Runx3 mice (red)

177 immunized with MOG<sub>35-55</sub>. **(G)** ThPOK expression (MFI) among CD3+CD4+ cells from LN 10

178 d.a.i (blue) and CNS 10-13 d.a.i (red) – representative of two independent experiments ( $n=3$

179 *in each experiment*). **(H)** Representative Flow cytometry analysis of Runx3 expression in

180 CD3+CD4+ThPOK+ cells ( $n=6$ ). **(I)** Frequency of Runx3+ cells among gated CD3+CD4+ThPOK+

181 cells from LN 10d.a.i. (blue), CNS 10d.a.i. (red). **(J)** Heatmap of t-SNE-based overview of CD4,

182 GzmB, T-bet, VLA-4, Runx3 and KLRG-1 expression. **(K)** Mean population expression levels of

183 all markers used for t-SNE visualization and FlowSOM clustering (left). The t-SNE algorithm

184 (10,000 CD3+CD4+ cells, randomly selected from CNS 13 d.a.i. ( $n=4$ )) was used to depict

185 different 5 populations therein. FlowSOM-based cell populations are overlaid as a color

186 dimension (right). **(L)** Expression intensity (MFI) of Runx3, T-bet, GzmB, VLA-4, KLRG-1 at

187 single cell level (400x CD3+CD4+ cells randomly selected) for each FlowSOM-based

188 population. Data are represented in mean +/- SEM; \* $p<0.05$ , \*\* $p<0.01$  \*\*\* $p<0.001$ .

189 **Cytotoxic profile of CD4+ T cells in PBMCs of the untreated patient with MS**

190 In EAE, the cytotoxic could be detected in the periphery during the early phase of the disease  
191 (**Fig. S1**). Therefore, in order to test whether the data generated in the animal model would  
192 apply to human disease, we recruited untreated RRMS and matched healthy controls (HC) to  
193 evaluate the extension of our data in PBMCs (**Table 1**). Here, we included RRMS patients  
194 assessed at the very early stage of the diagnosis (diagnosis) as well as patients that withdrawal  
195 the treatment by therapeutic failure or after reach 24 months of Natalizumab (NTZ)-treatment  
196 (washout) (**Table 1**). Then, we analyzed the expression of GzmB by CD3+CD4+ or CD3+CD8+  
197 cells in PBMCs by flow cytometry and the expression of cytotoxic-related molecules by qPCR  
198 in sorted CD3+CD4+ T cells. Our data demonstrated an increased percentage of CD4+GzmB+  
199 but not CD8+GzmB+ T cells in RRMS patients in relation to HCs (**Fig. 3A - 3D**). Strikingly, there  
200 is no correlation between the percentages of CD4+GzmB+ and CD8+GzmB+ T cells, which  
201 demonstrates a specific enhancement of the cytotoxic profile by CD4+ T cells (**Fig. 3E**).  
202 Moreover, the presence of CD4+GzmB+ T cells is significantly higher in the PBMCs from RRMS  
203 patients assessed at the time of the diagnosis in comparison with those in the washout period  
204 (**Fig. S2A**). Although we cannot rule out the residual effect of the previous treatment in the  
205 washout group, this result indicates that the cytotoxic profile in CD4+ T cells is more prominent  
206 during the earlier phase of the disease. Indeed, secondary-progressive MS (SPMS) patients did  
207 not present increased levels of CD4+GzmB+ T cells in relation to HC (**Fig. S2B**). No significant  
208 difference was found for the CD8+ T cells population (**Fig. S2C and S2D**). Consistently with our  
209 data obtained in the experimental model, the expression of GzmB was almost restricted to  
210 Runx3-expressing CD4+ T cells (**Fig. 3F**).  
211 Consistently, qPCR results demonstrated increased expression of Runx3 and GzmB mRNA in  
212 CD4+ T cells sorted from RRMS patients in comparison with HC (**Fig. 3G**). Although no

213 significant difference was found in expression levels of T-bet or RORyt, there was a significant  
 214 positive correlation ( $R^2=0.6054$ ) between mRNA expression of Runx3 and T-bet in RRMS  
 215 patients (**Fig. S2E**). In contrast, the mRNA expression of Runx3 and RORyt trended ( $R^2=0.3689$ ;  
 216  $p=0.1103$ ) to be negatively correlated (**Fig. S3E**). Taken together, these results reinforce the  
 217 notion that CD4-CTL exhibits a Th1-like profile promoted by the mutual expression of Runx3  
 218 and T-bet (Cruz-Guilloty et al., 2009; Quezada et al., 2010; Serroukh et al., 2018; Y. Wang et  
 219 al., 2014). Besides, we found an increased mRNA expression of SerpinB9, CD137, and VLA-4  
 220 in CD4+ T cells sorted from RRMS patients in comparison with HC (**Fig. 3G**). Interestingly, our  
 221 results demonstrated a significant decrease in mRNA expression of CTLA-4 and PD1 in CD4+ T  
 222 cells sorted cells from patients with RRMS, which agrees with previous work  
 223 (Mohammadzadeh et al., 2018) (**Fig. 3G**). Together, these data indicate that, even in PBMCs,  
 224 untreated RRMS patients present a specific enhancement of the cytotoxic profile in CD4+ T  
 225 cells in comparison with HC. Indeed, hierarchal cluster analysis segregated RRMS patients and  
 226 HCs based on the mRNA expression of cytotoxic-related and inflammatory molecules by CD4+  
 227 T cells (**Fig. 3H**).

228 **Table1**

| Subjects       | ♀ / ♂ | Age             | EDSS             | Time of first relapse (Years) |
|----------------|-------|-----------------|------------------|-------------------------------|
| Healthy Donors | 14/3  | 29 (19-41)      | -                | -                             |
| Untreated RRMS | 14/4  | 29 (24-59)      | 1.5 (0 - 7.5)    | 2.5 (0.5 - 23)                |
| Diagnosis      | 6/2   | 25.5* (24 - 59) | 1.0 (0 - 7.5)    | 1.0** (0.5 - 3)               |
| Washout#       | 8/2   | 33 (29 - 57)    | 1.75 (1.5 - 7.0) | 12 (5 - 24)                   |
| SPMS           | 4/9   | 47 (30 - 72)    | 7.0 (6.0 - 8.0)  | 16** (5 - 23)                 |
| Treated RRMS   | 26/12 | 39 (22 - 65)    | 1.75 (1.5 - 7.0) | 9.5 (2 - 32)                  |
| IFN/GA         | 14/2  | 39 (23-54)      | 1.0 (1.0 - 6.0)  | 10 (2 - 32)                   |
| FTY            | 9/4   | 40 (22-65)      | 2.5 (1.0 - 6.0)  | 11 (4 - 25)                   |
| NTZ            | 13/6  | 40 (26-62)      | 3.0 (1.0 - 6.5)  | 8.5 (2 - 15)                  |

Data are represented in Median (range)

#Washout RRMS patients; 1 Glatiramer, 6 Interferon and 3 Natalizumab

229  
230

Figure 3

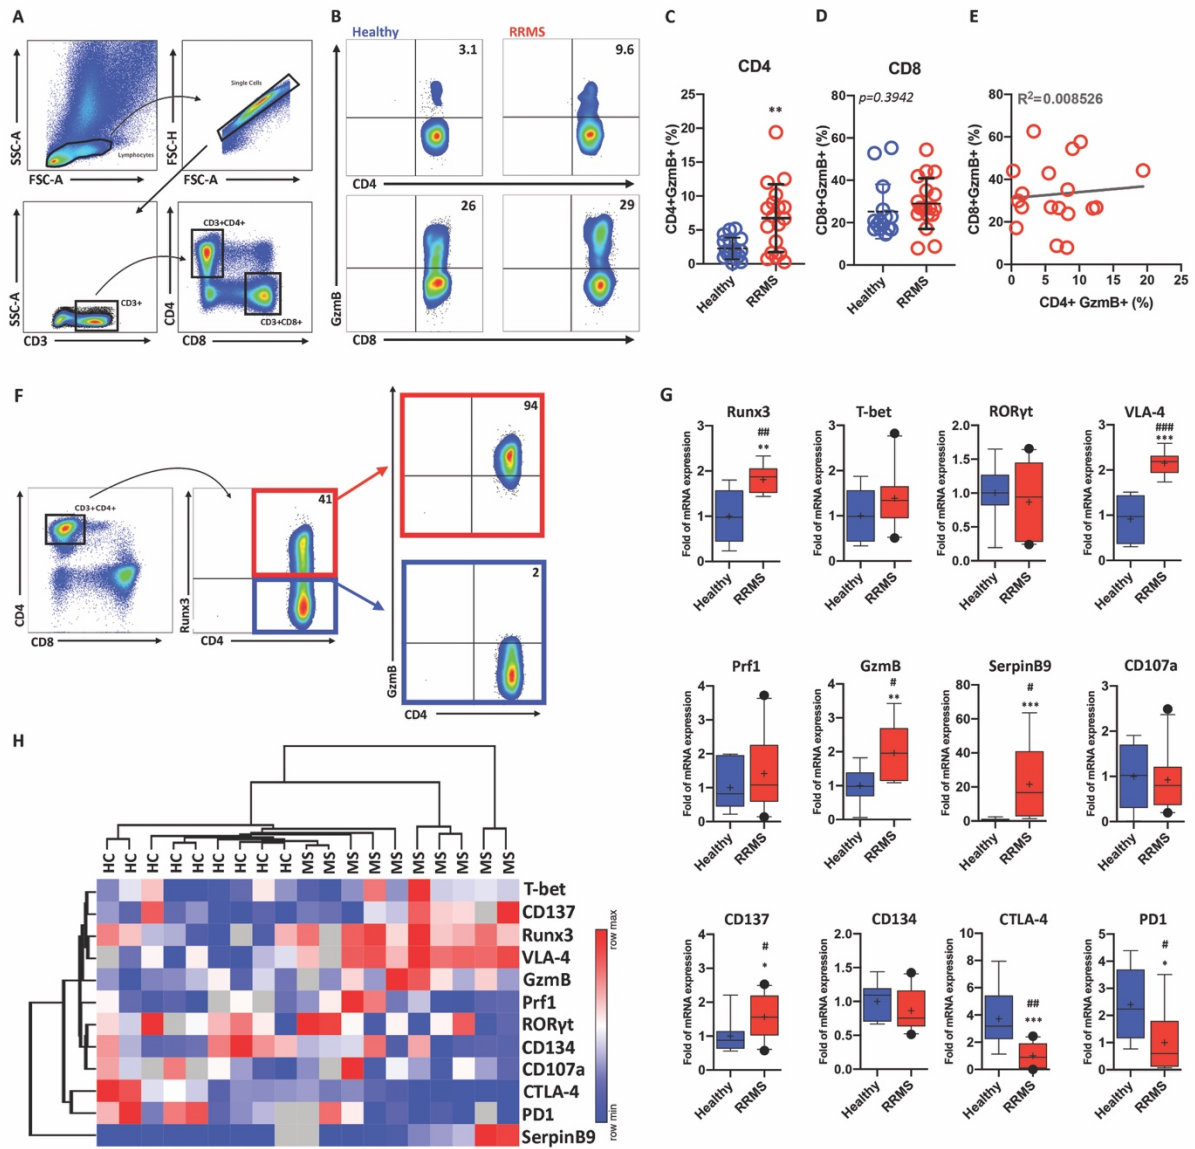

231

232 **Figure 3 – GzmB expression by CD4+ or CD8+ T cells in untreated patients with RRMS.**  
233 **(A)** Gate strategy of flow cytometry analysis of CD3+CD4+ or CD3+CD8+ T cells from PBMCs  
234 from healthy individuals and RRMS patients. **(B)** Representative flow cytometry plot of GzmB  
235 expression in CD4+ or CD8+ T cells from PBMCs of healthy individuals and RRMS patients. **(C)**  
236 GzmB expression in gated CD3+CD4+ cells from PBMCs of HCs (blue) ( $n=17$ ) or RRMS patients  
237 (red) ( $n=18$ ). **(D)** GzmB expression in gated CD3+CD8+ cells from PBMCs of healthy individuals  
238 (blue) ( $n=17$ ) or RRMS patients (red) ( $n=18$ ). **(E)** Correlation of GzmB expression in CD3+CD4+  
239 or CD3+CD8+ cells in RRMS ( $n=18$ ). **(F)** GzmB expression in CD4+Runx3+ cells (red) or  
240 CD4+Runx3- cells (blue) (*representative from 5 patients*). **(G)** mRNA expression (Runx3, T-bet,  
241 RORyt, CD49d, SerpinB9, Prf1, CD107a and GzmB) of CD3+CD4+ sorted cells from PBMCs of  
242 healthy individuals (blue) ( $n=9$ ) or RRMS patients (red) ( $n=10$ ). **(H)** Hierarchical cluster analysis  
243 of the relative expression of Runx3, VLA-4, GzmB, Prf1, CD107a, SerpinB9, CD134, CD137,  
244 PD1, CTLA-4, T-bet and RORyt in sorted CD3+CD4+ T cells of PBMCs from healthy individuals  
245 (HC) ( $n=9$ ) and RRMS patients ( $n=9$ ). Data are represented in mean +/- SEM; \* $p<0.05$ , \*\* $p<0.01$ ,  
246 \*\*\* $p<0.001$ ; (Bootstrap resampling and permutation; # $p<0.05$ , ## $p<0.01$ , ### $p<0.001$ ).



## 247 **Cytotoxic Profile of Myelin-Reactive CD4+ T cells**

248 Our data in the experimental model have indicated that the cytotoxic behavior of CD4+ T cells  
249 is enhanced upon autoantigen recognition (**Fig. 1A, 1B, and Fig. S1A**). Therefore, we accessed  
250 a publicly available sequencing (RNA-seq) expression dataset of myelin-reactive T cells from  
251 patients with MS (Cao et al., 2015). Briefly, CD4+CCR6+ memory T cells from HLA-DR4+  
252 healthy individuals and MS patients were amplified and stimulated with myelin peptides  
253 (MOG<sub>97-109</sub> and PLP<sub>180-199</sub>). After, myelin tetramers-positive (MOG<sub>97-109</sub> and PLP<sub>180-199</sub>  
254 tetramers) and tetramer-negative cells were sorted for RNA-seq (Cao et al., 2015).  
255 Comparison of tetramer-positive samples from HCs or MS revealed differential expression of  
256 transcription factors and activation markers previously related to CD4-CTL (Donnarumma et  
257 al., 2016; Śledzińska et al., 2020) or effector CD8+ T cells (D. Wang et al., 2018) (**Fig 4A**). Thus,  
258 we enriched the dataset analysis for cytotoxic-related and inflammatory molecules. Similarity  
259 matrix and correlation hierarchical clustering analysis show a strong correlation between MS  
260 tetramer-positive (TET+) samples based on the global expression of the selected genes (**Fig**  
261 **4B**). Then, we used the similarity matrix of gene expression to select co-expressed genes (**Fig**  
262 **4C**). Selected genes (46) were used to evaluate the expression in MS patients' samples.  
263 Individually, 22 of 46 genes (45%) were significant between MS tetramer-positive (MS TET+)  
264 and MS tetramer-negative (MS TET-) samples (**Fig. 4D**). Nevertheless, based on these  
265 molecules, hierarchical clustering analysis segregate myelin-reactive MS TET+ cells from MS  
266 TET- (**Fig. 4D**). In order to have a better idea of the functional identity and connectivity of  
267 those molecules, we used the STRING network and clustering analysis ([https://string-](https://string-db.org/cgi/network.pl?taskId=rgnZ13we8jW)  
268 [db.org/cgi/network.pl?taskId=rgnZ13we8jW](https://string-db.org/cgi/network.pl?taskId=rgnZ13we8jW)). The molecules were grouped by molecular  
269 category (**Fig. 4E**). The analysis demonstrated a highly connected network, which is enriched

270 by Th1 and Th17-related cytokines as well as cytotoxic-related effector molecules and  
 271 transcription factors.

272 Altogether, our data consistently demonstrated a robust cytotoxic behavior of pathogenic  
 273 CD4+ T cells upon autoantigen stimulus, which is restricted to patients with MS. Markedly,  
 274 our analysis showed differential expression of IL2RA, PRDM1 (blimp1) and IRF4 (**Fig. 4E**),  
 275 which are directly related to the effector activity of CD8+ T cells (D. Wang et al., 2018).

276

Figure 4

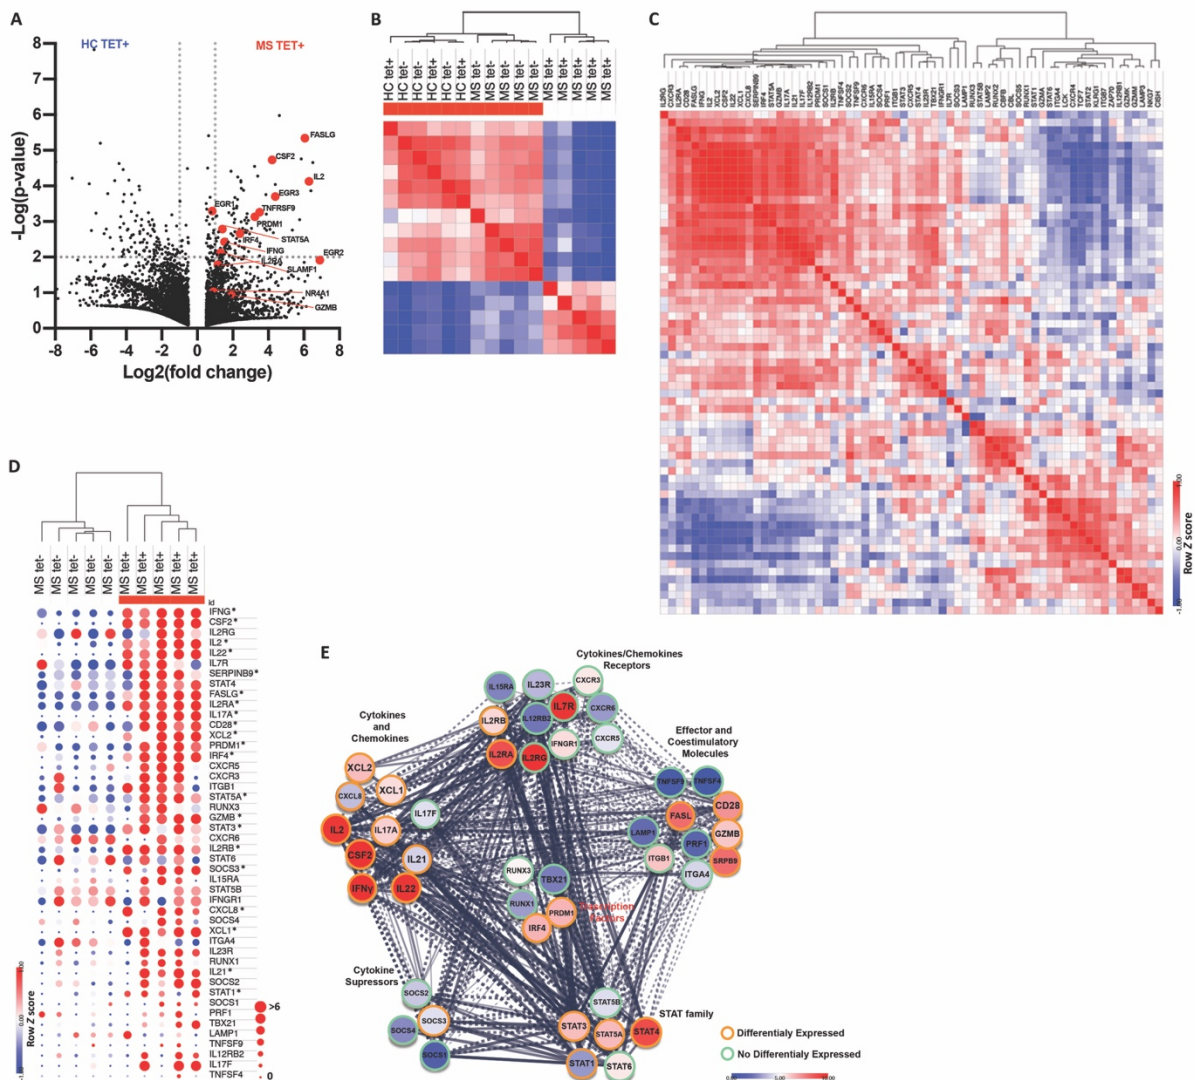

277

278 **Figure 4 – Cytotoxic profile of myelin-reactive CD4+ T cells**

279 **(A)** Tetramer-positive cells differential gene expression between HC and RRMS samples ( $p <$   
280  $0.01$ ) **(B)** Similarity matrix and clustering analysis of global mRNA expression of CD4+CCR6+  
281 memory T cells from MS tetramer+ (MS TET+), MS tetramer- (MS TET-), HC tetramer+ (HC  
282 TET+) or HC tetramer- (HC TET-) samples. **(C)** Similarity matrix and clustering analysis of  
283 selected genes expression in the 4 groups **(D)** Heat map of normalized log<sub>2</sub>FPKM values for  
284 the indicated genes in MS tetramer+ or MS tetramer- samples (z-score by color; log<sub>2</sub> fold  
285 change by size - \*differentially expressed). **(E)** STRING network representation of molecules  
286 enriched in MS tetramer+ samples. The color of each molecule shows a fold change of MS  
287 TET+ relative to MS TET-. Differentially expressed molecules are label by orange circles and  
288 no differentially expressed by green circles.

## 289 **Single-Cell mRNA Sequence of CSF Cells from MS Patients**

290 Our data in the experimental model demonstrated that the cytotoxic profile of CD4+ T cells is  
291 enhanced after these cells reach the CNS. Therefore, we again took advantage of publicly  
292 available data to evaluate the extension of our data in CD4+ T cells from the CSF of MS  
293 patients. For that, we accessed the single-cell mRNA sequence (scRNA-seq) of CSF cells from  
294 MS-discordant monozygotic twin pairs (Beltrán et al., 2019a). First, we reconstructed the t-  
295 SNE leukocytes landscape (**Fig. 5A**). Interestingly, as in the original analysis, we were not able  
296 to segregate CD8+ and CD4+ T cells populations inside the T cell cluster. Instead, we also  
297 identify two regions, one housing preferentially CD4+ T cells and another housing CD8+ T cells  
298 (**Fig. 5B**). Therefore, we used the expression of CD3D and CD4 to manually select the CD4+ T  
299 cell population in order to evaluate the expression of cytotoxic-related molecules (**Fig. 5C**).  
300 Then, we used Louvain clustering to determine the subpopulations of CD4+ T cells (**Fig. S3A**).  
301 Further, we verified the expression of CD4-CTL-related molecules, defined by our data and  
302 others (Takeuchi et al., 2015; D. Wang et al., 2018), to identify which cluster represents better  
303 CD4-CTL population (**Fig. 5D**). The co-expression of those molecules indicates the cluster 3  
304 (C3) is the CD4-CTL population (**Fig. 5E**). The expression of IL2RB, CRTAM, IFNG-AS1, EOMES,  
305 and GzmH were significantly higher in C3 in comparison with the remaining CD4+ T cells (**Fig.**  
306 **S3B**). C3 cluster presents a massive enrichment of CD4+ from patients with MS in comparison  
307 with HCs (**Fig. 5F and S3C**).  
308 Our analysis demonstrated that the CD4+ T cells of CSF from MS patients present an evident  
309 enrichment of CD4-CTLs in comparison with HC, again corroborating our data in the  
310 experimental model.

311

312

Figure 5

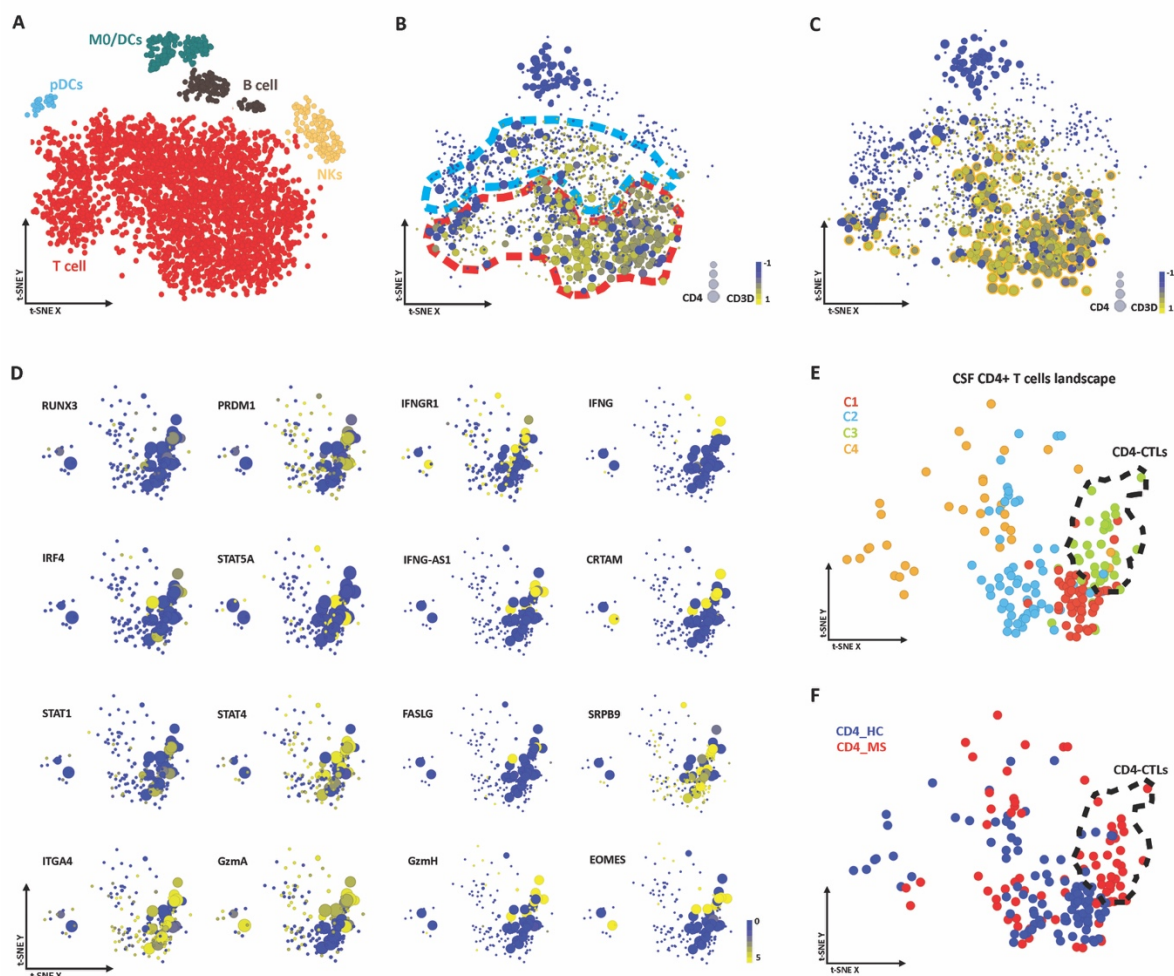

313

314 **Figure 5 – scRNA-seq of CSF cells**

315 **(A)** Flowchart of the of t-SNE-based analysis of human CSF by scRNA-Seq. **(B)** Expression  
316 [log(Transcripts per million +1)] of CD3D (color) and CD4 (symbol size). The analysis shows  
317 two different populations in T cell cluster, one representing preferentially CD4+ T cells (red)  
318 and another representing preferentially CD8+ T cells (blue). **(C)** Selection (orange circle) of  
319 CD3D+CD4+ cells (CD3D by symbol color and CD4 by symbol size). **(D)** Expression of CD4-CTLs-  
320 related molecules in the CD3D+CD4+ population at the t-SNE-based landscape (IL2RB by  
321 symbol size; target gene by symbol color). **(E)** Louvain clustering of CD3D+CD4+ cells at the t-  
322 SNE-based landscape. Defined CD4-CTLs population (C3) were highlighted (discontinuous  
323 black line). **(F)** Distribution of CD4+ cells from CSF of HCs (blue) and RRMS patients (red) at  
324 CD3D+CD4+ t-SNE-based landscape.

325

## 326 **Cytotoxic CD4+ T cells and VLA-4**

327 Migration and BBB disruption are critical elements for the onset of autoimmune  
328 neuroinflammation (Kebir et al., 2007; Yednock et al., 1992). Collectively, our results in EAE or  
329 RRMS indicates a robust expression of VLA-4 by CD4-CTL. In monocyte-derived dendritic cells,  
330 the ectopic expression of Runx3 enhances the expression of VLA-4 (Domínguez-Soto et al.,  
331 2005). Consistently, we demonstrated a strong positive correlation ( $R^2=0.4999$ ) between the  
332 expression of Runx3 and VLA-4 in untreated RRMS patient CD4+ T cells (**Fig. S2E**). Moreover,  
333 ChiP-seq analysis from ENCODE data bank demonstrated direct binding of Runx3 to ITGA4  
334 locus at the promoter region (**Fig. 6A**). In PBMCs from MS patients, the expression of GzmB is  
335 almost restricted to CD4+VLA-4+ cells (**Fig. 6B**). VLA-4 is the target of NTZ, which is a highly  
336 effective monoclonal antibody for the treatment of RRMS (Steinman et al., 2012). In this  
337 context, we hypothesized that NTZ-treatment might target specifically those CD4-CTLs.  
338 Therefore, to evaluate the impact of the treatments, specially NTZ, over CD4-CTL, we enrolled  
339 48 treated RRMS patients (**Table 1**). Then, we evaluated the presence of CD4+GzmB+ and  
340 CD8+GzmB+ T cells in RRMS patients treated with immunomodulatory drugs [Glatiramer  
341 Acetate (GA) or interferon- $\beta$  (IFN)], Fingolimod (FTY) or NTZ. As we hypothesized, NTZ-  
342 treated RRMS patients present enrichment of CD4+GzmB+ T cells in PBMCs in comparison  
343 with the other treatments or untreated patients (**Fig. 6C**). FTY-treated patients shown a slight  
344 increase in the percentage of CD4+GzmB+ T cells in comparison with IFN/GA-treated and  
345 untreated patients, which had been previously described (Fujii et al., 2016) (**Fig. 6C**). NTZ-  
346 treated patients also shown enrichment of CD8+GzmB+ T in comparison with the other  
347 treatments or untreated patients (**Fig. 6D**).

348

349

Figure 6

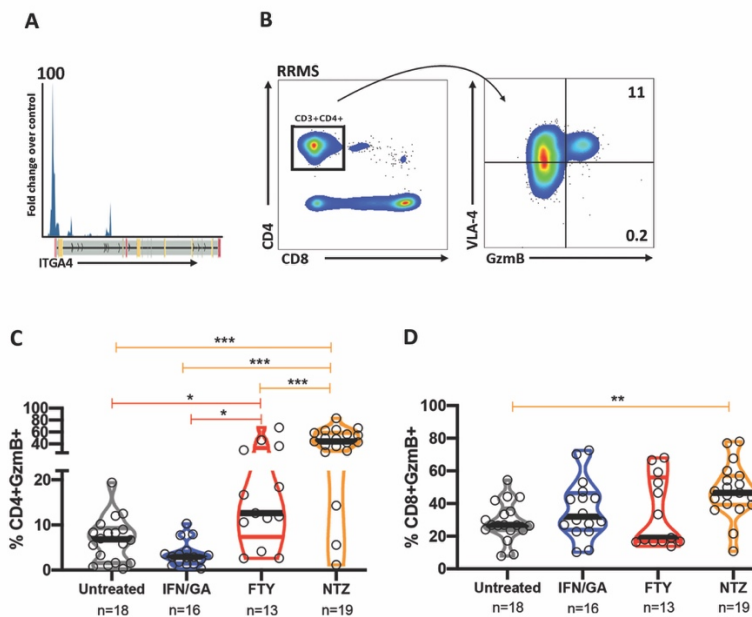

350

351

352 **Figure 6 - Cytotoxic CD4+ T cells and VLA-4**

353 (A) Runx3 ChIP-seq analysis from ENCODE data bank in ITGA4 locus. (B) VLA-4 and GzmB

354 expression (right) in gated CD3+CD4+ (left) from PBMCs of patients with MS (*representative*

355 *from 5 patients*). (C) Violin plot of GzmB expression in gated CD3+CD4+ cells from PBMCs of

356 untreated (gray) (*n*=18), IFN-treated (blue) (*n*=16), FTY-treated (red) (*n*=13) and NTZ-treated

357 (orange) (*n*=19) RRMS patients. (D) Violin plot of GzmB expression in gated CD3+CD8+ cells

358 from PBMCs of untreated (gray) (*n*=18), IFN-treated (blue) (*n*=16), FTY-treated (red) (*n*=13)

359 and NTZ-treated (orange) (*n*=19) RRMS patients. Data are represented in median (bold bar) and 95%

360 C.I. (color bars); \**p*<0.05, \*\**p*<0.01 \*\*\**p*<0.001.



361 **Discussion**

362 Here, we demonstrated that autoaggressive encephalitogenic CD4+ T cells present a cytotoxic  
363 phenotype during the early phase of EAE and RRMS. Robust and concordant data support the  
364 critical role of CD4-CTLs during initial autoimmune neuroinflammation.

365 Our mRNA expression analysis of CD4+ T cells from EAE or MS patients demonstrated an  
366 enhancement of cytotoxic-related molecules. Also, encephalitogenic CD4+ T cells were  
367 sufficient to promote the initial CNS damage, in the absence of a previous inflammatory  
368 milieu. Of note, CD4+ T cells from PBMCs of patients with MS show cytolytic activity to  
369 neurons and oligodendrocytes *in vitro* (Kebir et al., 2007; Zaguia et al., 2013). Therefore, CD4+  
370 T cells present not only a cytotoxic phenotype but also a direct cytolytic activity.

371 Previously, autoaggressive Th17 cells have been shown to use GzmB to breach the BBB during  
372 EAE initial neuroinflammation (Kebir et al., 2007). In contrast, our data demonstrated that  
373 CD4-CTLs presents a Th1 profile preferentially. However, in the EAE model, Th17 cells turn  
374 into IFN $\gamma$ -producing cells after reach the CNS (Hirota et al., 2011). Thus, effector CD4-CTLs  
375 inside the CNS and autoaggressive Th17 cells in the periphery may represent the same  
376 population in different stages. Consistently, the expression analysis of myelin-reactive CD4+  
377 T cells from patients with MS showed an enhancement of Th1 and Th17-related cytokines as  
378 well as cytotoxic-related molecules. Moreover, our flow cytometry analysis of CNS-infiltrated  
379 CD4+ T cells presents a population that expresses high levels of VLA-4 and intermediary levels  
380 of GzmB (VLA-4<sup>hi</sup>). VLA-4 is an adhesion receptor essential to the transmigration of circulating  
381 leukocytes into the CNS in EAE (Yednock et al., 1992). Thus, the VLA-4<sup>hi</sup> population is probably  
382 the CD4+ T cells that just infiltrated the CNS. In this case, the differential expression of GzmB  
383 by this population is in agreement with Kebir's data (Kebir et al., 2007).

384 The conversion of Th17 cells into IFN $\gamma$ -producing cells is dependent on T-bet and Runx

385 transcription factors expression (Y. Wang et al., 2014). In this context, our data revealed that  
386 the expression of GzmB by CD4+ T cells is almost restricted to Runx3-expressing cells either in  
387 EAE or RRMS. Noteworthy, the heterogeneous network edge prediction analysis indicates  
388 Runx3 as an MS-associated gene (Himmelstein and Baranzini, 2015). Upon TCR stimulation,  
389 Runx3 promotes accessibility to regions highly enriched with IRF and PRDM1-like motifs in  
390 naïve CD8+ T cells (D. Wang et al., 2018). Subsequently, the expression of those transcription  
391 factors and IL-2 receptor is critical to early effector and memory precursor CD8+ T cell  
392 differentiation (D. Wang et al., 2018). Consistently, our RNA-seq analysis demonstrated an  
393 enhancement of PRDM-1, IRF4, IL2RA, and IL2RB expression either by myelin-reactive T cells  
394 or CD4-CTLs from CSF. Remarkable, the ablation of PRDM-1 prevent GzmB expression and  
395 anti-tumor activity of CD4-CTLs (Śledzińska et al., 2020). Moreover, IRF4 and PRDM-1 deficient  
396 mice present a minor incidence and severity of EAE, very similar to what we have shown to  
397 Runx3 deficient mice (Brüstle et al., 2007; Jain et al., 2016). Besides the enhancement of  
398 cytotoxic-related transcription factors, we found a differential expression of cytotoxic effector  
399 molecules such as; GzmB, GzmaA, SerpinB9, CD137 (TNFRSF9), and FASLG either in peripheral  
400 blood or CSF. Altogether, our data robustly demonstrated that autoaggressive CD4-CTLs  
401 fulfills the majority of the molecular pathways of effector CD8+ T cells (Hartung et al., 2015;  
402 Janas et al., 2005; Pearce et al., 2003; Suzuki et al., 1997; Verdeil et al., 2006; D. Wang et al.,  
403 2018; Zhang et al., 2019).

404 Strikingly, we and others were unable to distinctly separate CD4+ and CD8+ T cell populations  
405 from MS samples by their expression profile (Beltrán et al., 2019b; Schafflick et al., 2020).  
406 These data contribute to the notion that CD4+ T cells behavior much like effector CD8+ T cells  
407 during the course of the disease. In MS, the percentage of cytotoxic-like CD4+ T cells  
408 (CD4+CD28null) in the peripheral blood seems to present a direct link with the disease severity

409 as well as a prognostic value (Peeters et al., 2017). Consistently, we demonstrated that the  
410 presence of CD4+GzmB+ T cells is prominent in the peripheral blood of untreated patients  
411 with RRMS assessed at the very early stage of the diagnosis. Moreover, the expression of  
412 cytotoxic-related molecules by CD4+ T cells was sufficient to segregate untreated RRMS and  
413 HC. Thus, although our data need to be extended to a larger cohort, the cytotoxic profile of  
414 CD4+ T cells holds great potential to aid RRMS diagnosis.

415 Further, we found that NTZ treatment massively restrains CD4+GzmB+ and CD8+GzmB+ T  
416 cells in the peripheral blood. The discontinuation of NTZ treatment may lead to a clinical and  
417 radiological rebound, which, in some cases, is fatal (Larochelle et al., 2017). In fatal rebound  
418 following NTZ discontinuation CD4+GzmB+ and CD8+GzmB+ T cells accumulate in the brain  
419 parenchyma (Larochelle et al., 2017). Noteworthy, the high cytotoxic activity of lymphocytes  
420 has been related to steroid resistance in obstructive pulmonary disease and neuromyelitis  
421 optica spectrum disorder (Boldrini et al., 2020; G. Hodge and S. Hodge, 2016). Thus, the  
422 restraining of those cytotoxic cells in the periphery seems to be, at least in part, direct related  
423 to the beneficial effect of NTZ treatment. In this context, the percentage of CD4-CTLs in the  
424 peripheral blood could reveal a valuable readout for monitoring the treatment outcome.

425 Our finds suggest a critical role of CD4-CTLs during the initial autoimmune  
426 neuroinflammation. Furthermore, our results argue for the diagnostic and prognostic  
427 potential of monitoring CD4-CTLs percentage in the peripheral blood. A comprehensive  
428 assessment of the cellular and molecular mechanisms of CD4-CTLs might be beneficial to  
429 understand their pathological role in MS better. Ambitiously, further studies might point to  
430 CD4-CTLs as a viable target for the development of new therapeutic strategies.

## 431 **Materials and Methods**

### 432 **Study approval**

433 All animal experiments in this study followed protocols approved by the Animal Care and Use  
434 Committee at the University of Campinas (CEUA-UNICAMP #4657-1, #4656-1, #4658-1,  
435 #3890-1, #4420-1, #3936-1 and GMO CiBio #01/2013). Both RRMS patients and healthy  
436 control subjects included in this work signed a term of consent approved by the University of  
437 Campinas Committee for Ethical Research (CAAE: 53022516.3.0000.5404 and  
438 CAAE: 64431516.4.0000.5404).

439

### 440 **Animals**

441 Eight-week-old C57BL/6 background mice (C57BL/6<sup>WT</sup>, IFN $\gamma$ <sup>yfp</sup>(B6.129-I $fng$ <sup>tm3.1Lky</sup>/J), IL-  
442 17A<sup>yfp</sup>(C57BL/6-Il17a<sup>tm1Bcgen</sup>/J), Runx3<sup>fl/fl</sup>(B6.129P2-Runx3<sup>tm1ltan</sup>/J), Runx3<sup>yfp</sup>(B6;129P2-  
443 Runx3<sup>tm1Litt</sup>/J), and CD4<sup>Cre</sup>(STOCK Tg(Cd4-cre)1Cwi/BfluJ)) were obtained from the Jackson  
444 Laboratory and established as a colony at the University of Campinas Breeding Center, where  
445 they were housed and maintained under pathogen-free conditions in the university animal  
446 facility. The experimental animals were allowed access to standard rodent chow and water  
447 ad libitum, with the temperature maintained between 21° and 23°C and a 12-h light/12-h  
448 dark cycle. All procedures were carried out following the guidelines proposed by the Brazilian  
449 Council on Animal Care.

450

### 451 **Subjects**

452 Untreated RRMS patients were recruited at the time of the diagnostic (8) or during treatment  
453 washout (10). Treatment washout was applied due to therapeutic failure or after 24 months  
454 of Natalizumab treatment (Stangel and Stüve, 2014) (**Table S1**). Also, 48 treated (16 IFN/GA,

455 13 FTY, and 19 NTZ) RRMS patients were recruited (**Table S1**). All RRMS patients were  
456 included in the study after confirmation of the diagnosis according to the revised McDonald  
457 criteria (Polman et al., 2011). Also, 17 matched healthy subjects were included in the control  
458 groups.

459

#### 460 **Blood samples collection and lymphocyte separation**

461 Peripheral blood (25 mL) samples were collected from RRMS patients and healthy volunteers.  
462 Peripheral blood mononuclear cells (PBMCs) were separated by Ficoll-Hypaque® density  
463 gradient centrifugation, as previously described (Longhini et al., 2011).

464

#### 465 **Experimental Autoimmune Encephalomyelitis**

466 Mice were immunized subcutaneously with 150 µg of MOG<sub>35-55</sub> or 100 µg of OVA in complete  
467 Freud's adjuvant (CFA), and 4 mg/ml heat-inactivated *Mycobacterium tuberculosis* and with  
468 an intraperitoneal injection of Bordetella pertussis toxin (0 and 2 d.a.i.).

469

#### 470 **Quantitative PCR**

471 mRNA was extracted using the RNeasy micro kit (QIAGEN) and reverse transcribed to cDNA.  
472 For mouse experiments, the primers for RORα, RORγt, T-bet, Eomes, Runx3, IFNγ, IL-17a,  
473 GzmB, GzmC, Xcl-1, CD134, CD137, CD107a, CD107b, PRF1, and VAV3 were obtained from  
474 Applied Bioscience inventoried catalog. For human samples, qPCR was performed using  
475 SYBR® Green manufacturer's instructions (BioRad, USA). PCR analysis was performed using a  
476 TaqMan ABI Prism 7500 Sequence Detector (PE Applied Biosystems, Germany), and mRNA  
477 was normalized to that of a housekeeping gene (GAPDH or HRP). The data were generated

478 using independent duplicate measurements. The threshold cycle value of individual  
479 measurements did not exceed 0.5 amplification cycles.

480

#### 481 **Antibodies and Flow Cytometry**

482 The following antibodies were used: for mouse; anti-CD3 (145-2C11), anti-TCR $\alpha\beta$  (H57-597),  
483 anti-CD4(GK1.5), anti-CD8 $\alpha$  (53-6.7), anti-GzmB (NGZB), anti-CD134 (OX-86), anti-CD107a  
484 (1D4B), anti-Eomes (Dan11mag), anti-Runx3 (R3-5G4), anti-VLA-4 (R1-2) and anti-ThPOK  
485 (2POK); for humans; anti-CD3 (SK7, SP34-2), anti-CD4 (SK3, RPA-T4), anti-CD8 (SK1), anti-  
486 Runx3 (R3-5G4), anti-VLA-4 (9F10) and anti-GzmB (GB11) . Antibodies were conjugated to the  
487 following fluorescent dyes: fluorescein isothiocyanate (FITC), phycoerythrin (PE), peridinin  
488 chlorophyll protein (PercP), allophycocyanin (APC), phycoerythrin-cyanine 7 (PECy7),  
489 allophycocyanin-cyanine 7 (APCcy7), Brilliant-Violet 421 (BV421). A Foxp3 transcription factor  
490 fixation/permeabilization kit (eBioscience, USA) was used for intracellular staining of Eomes,  
491 Runx3, CD107a, ThPOK, and GzmB. All analyses were performed using a flow cytometer  
492 Gallios (Beckman-Coulter, USA) or FACSVerse (BD bioscience, USA).

493

#### 494 **Cell sorting**

495 All sorting was performed using a cell sorter flow cytometer FACSaria II (BD Bioscience, USA).  
496 Cells were kept on ice before and after sorting analysis. Cell purity was confirmed immediately  
497 after sorting.

498

#### 499 **Brain slice incubation**

500 Brains were aseptically obtained, rapidly packed in 2% agarose cubes and sliced (400  $\mu$ m) with  
501 a vibratome. CD4<sup>+</sup> T cells from mice immunized for EAE or controls (ovalbumin immunized

502 mice or unimmunized mice) were sorted with a flow cytometer. Sorted cells were incubated  
503 with slices ( $5 \times 10^5$  cells/slice) for 6 hours in Hanks' Balanced Salt solution (Sigma-Aldrich, USA)  
504 supplemented with 1% of penicillin/streptomycin solution (Thermo-Fisher Scientific, USA).  
505 After the incubation period, brain slices were placed in Tissue-Tek OCT compound (Sakura  
506 Finetek, USA) and frozen.

507

### 508 **Confocal Microscopy**

509 *In situ* expression of cleaved caspase-3 in the brain from EAE and from control animals  
510 (ovalbumin immunized mice or unimmunized mice) was performed following the protocol for  
511 immunofluorescence staining. Briefly, frozen brains in Tissue-Tek OCT compound (Sakura  
512 Finetek, USA) were sliced to produce 10  $\mu\text{m}$  sections using a cryostat and submitted to  
513 staining. For this, the tissue was blocked to avoid nonspecific reactions with donkey serum  
514 (Sigma-Aldrich, USA) and permeabilized with Triton X-100 (Sigma-Aldrich, USA). Then, a  
515 primary antibody against cleaved caspase-3 (Cell Signaling Technology, USA) was added  
516 (1:200) and incubated overnight. The following day, slices were washed and incubated with  
517 secondary antibodies (Alexa 488) (Cell Signaling Technology, USA) (dilution 1:500) plus DAPI  
518 (Sigma-Aldrich, USA). For confocal controls, primary antibodies were omitted from the  
519 staining procedure and were negative for any reactivity. All images were obtained using  
520 confocal microscopy at INFABIC-UNICAMP.

521

### 522 **RNA-seq data analysis**

523 We accessed publicly RNA-Seq expression data deposited in the NCBI's Gene Expression  
524 Omnibus (GEO) database under accession numbers GSE66763. Briefly, CCR6+ memory CD4+  
525 T cells from HLA-DR4+ healthy controls (HC) and HLA-DR4+ MS patients (MS) were amplified

526 by PHA and IL-2 and stimulated by irradiated autologous monocytes and DR4 myelin peptides  
527 (MOG97–109 and PLP180–199). Then, myelin tetramer+ (TET+) and tetramer– (TET–) cells  
528 were sorted for RNA sequencing (Cao et al., 2015).

529

### 530 **scRNA-Seq data analysis**

531 We accessed publicly scRNA-Seq expression data deposited in the NCBI’s Gene Expression  
532 Omnibus (GEO) database under accession numbers GSE127969. Then, we used the same filter  
533 parameters (removing transcripts detected in fewer than 3 cells and kept only cells with 200  
534 to 6000 detected transcripts) from the original publication (Beltrán et al., 2019a). The detection  
535 of variable genes, unbiased graph-based clustering of single-cell data, was done using  
536 scOrange software (Stražar et al., 2019).

537

### 538 **Statistical analysis**

539 Statistical significance of the results was determined using analysis of variance (Kruskal–Wallis  
540 or ANOVA; U-test or *t*-test). Grubbs’ test was used to determine and exclude outlier values.  
541 Correlations were determined by Pearson or Spearman rank tests as appropriate. Bootstrap  
542 resampling (100,000x) and permutation (BsRP) were used in the qPCR analysis of human  
543 samples to minimize statistical interference due to the small sample size. The results of BsRP  
544 have expressed *p*-value ( $nH_0+1/99999+1$ ). Hierarchical cluster analysis was performed using  
545 the Euclidean distance metric. A *P*-value of less than 0.05 was considered significant in all tests.  
546 t-distributed stochastic neighbor embedding (t-SNE) (iteration = 3,000; perplexity = 30;  
547 learning rate = 252; gradient algorithm = Barnes-Hut) was performed using Flowjo R studio-  
548 based plugin.

549



550 **Software**

551 Basic statistical analysis was performed using GraphPad Prism software. Bootstrap resampling  
552 and permutation were performed using Rstudio software. Heat map and hierarchical cluster  
553 analysis were performed using the MORPHEUS web-based tool  
554 (<https://software.broadinstitute.org/morpheus/>). All images obtained were analyzed using  
555 the Image J. FACS data was analyzed using the FlowJo 10.6 software package (Tri-Star, USA).  
556 Single-cell data analysis was done using scOrange 3.24 software.

557 **Competing Financial Interests**

558 The authors declare that they have no competing financial interests.

559

560 **Data Availability**

561 All raw data are publicly available at the University database ([https://drive.google.com/open?id=1-0PoClxU8m4hjW75REwlv0Kn7WbxkANs&authuser=neuroib@unicamp.br&usp=drive\\_fs](https://drive.google.com/open?id=1-0PoClxU8m4hjW75REwlv0Kn7WbxkANs&authuser=neuroib@unicamp.br&usp=drive_fs)).

563

564 **Acknowledgment**

565 The authors would like to thank M.A. Mori, N.O.S. Câmara, D. Martins-de-Souza, H.M. Souza,  
566 P.M.M. Vieira, M.A. Vinolo, F. Papes, R. Vicentini and H.F. Carvalho for critically reading the  
567 manuscript and/or for providing resources. The authors acknowledge the aid of Natalia  
568 Coutouné with bootstrap resampling and permutation script design. We thank the National  
569 Institute of Science and Technology of Photonics Applied to Cell Biology (INFABIC) for aid with  
570 confocal microscopy. The authors acknowledge the technical help of Adriel S. Moraes, Marcos  
571 C. Menegheti.

572

573 **Financial Support**

574 This work was supported by grants from São Paulo Research Foundation (FAPESP)  
575 (#2011/18728-5, #2014/26431-0, #2015/22052-8 #2017/21363-5 and 2019/06372-3), the  
576 National Institute of Science and Technology in Neuroimmunomodulation (INCT-NIM)  
577 (#465489/2014-1), CNPq Universal grant (#406688/2016-8) and FAEPEX-UNICAMP young  
578 researcher grant (#2130/17). A.S.F. was supported by FAPESP young researcher fellowship  
579 (#2012/01408-0) and CNPq productivity awards (#311009/2014-0 and #306248/2017-4). F.P.,  
580 G.A.D.M., C.F.R., E.S.M.F., M.R-P., M.B-jr. and B.B.C. was supported by FAPESP fellowships.

581 V.O.B., A.M.M., V.C.L. R.S.C., and N.S.B. were supported by CNPq and CAPES fellowships  
582 provided by Genetic and Molecular Biology Graduate Program-UNICAMP.

583

#### 584 **Author Contributions**

585 F.P., A.M.M., and G.A.D.M. performed most of the experiments in the experimental model.  
586 VOB performed most of the experiments in RRMS patients and healthy donors. C.R.V.S, F.vG.,  
587 and A.D. selected and recruited all patients and healthy individuals. C.F.R. performed acute  
588 slice incubation and immunohistochemistry experiments. E.S.M.F., R.S.C., N.B., B.B.C., and  
589 V.C.L. established and performed experiments with genetically modified mouse strains. M.B-  
590 jr. performed experiments with OVA antigen-immunized animals. A.L.F.L. and M.R-P. designed  
591 and performed flow cytometry and cell sorting experiments. A.S.F. and L.M.B.S designed the  
592 experimental work. A.S.F. coordinated the study and wrote the manuscript with inputs from  
593 co-authors.

594

595 **Reference**

- 596 Aqel, S.I., Granitto, M.C., Nuro-Gyina, P.K., Pei, W., Liu, Y., Lovett-Racke, A.E., Racke, M.K.,  
597 Yang, Y., 2018. Distinct roles for Blimp-1 in autoreactive CD4 T cells during priming and  
598 effector phase of autoimmune encephalomyelitis. *J Neuimmunol* 325, 20–28.  
599 doi:10.1016/j.jneuroim.2018.10.007
- 600 Baxter, A.G., 2007. The origin and application of experimental autoimmune  
601 encephalomyelitis. *Nat Rev Immunol* 7, 904–912. doi:10.1038/nri2190
- 602 Beltrán, E., Gerdes, L.A., Hansen, J., Flierl-Hecht, A., Krebs, S., Blum, H., Ertl-Wagner, B.,  
603 Barkhof, F., Kümpfel, T., Hohlfeld, R., Dornmair, K., 2019a. Early adaptive immune  
604 activation detected in monozygotic twins with prodromal multiple sclerosis. *J. Clin. Invest.*  
605 129, 1747. doi:10.1172/JCI128475
- 606 Beltrán, E., Gerdes, L.A., Hansen, J., Flierl-Hecht, A., Krebs, S., Blum, H., Ertl-Wagner, B.,  
607 Barkhof, F., Kümpfel, T., Hohlfeld, R., Dornmair, K., 2019b. Early adaptive immune  
608 activation detected in monozygotic twins with prodromal multiple sclerosis. *J. Clin. Invest.*  
609 129, 4758–4768. doi:10.1172/JCI128475
- 610 Boldrini, V.O., Brandão, C.O., Pimentel, M.L.V., Vidal, A., Mansur, L.F., Quintiliano, R.P.S.,  
611 Santos, L.M.B., Farias, A.S., 2020. Massive activity of cytotoxic cells during refractory  
612 Neuromyelitis Optica spectrum disorder. *J Neuimmunol* 340, 577148.  
613 doi:10.1016/j.jneuroim.2020.577148
- 614 Brüstle, A., Heink, S., Huber, M., Rosenplänter, C., Stadelmann, C., Yu, P., Arpaia, E., Mak,  
615 T.W., Kamradt, T., Lohoff, M., 2007. The development of inflammatory TH-17 cells  
616 requires interferon-regulatory factor 4. *Nat. Immunol.* 8, 958–966. doi:10.1038/ni1500
- 617 Cao, Y., Goods, B.A., Raddassi, K., Nepom, G.T., Kwok, W.W., Love, J.C., Hafler, D.A., 2015.  
618 Functional inflammatory profiles distinguish myelin-reactive T cells from patients with  
619 multiple sclerosis. *Sci. Transl. Med.* 7, 287ra74. doi:10.1126/scitranslmed.aaa8038
- 620 Cheroutre, H., Husain, M.M., 2013. CD4 CTL: living up to the challenge. *Semin. Immunol.* 25,  
621 273–281. doi:10.1016/j.smim.2013.10.022
- 622 Cruz-Guilloty, F., Pipkin, M.E., Djuretic, I.M., Levanon, D., Lotem, J., Lichtenheld, M.G., Groner,  
623 Y., Rao, A., 2009. Runx3 and T-box proteins cooperate to establish the transcriptional  
624 program of effector CTLs. *J Exp Med* 206, 51–59. doi:10.1084/jem.20081242

- 625 Domínguez-Soto, A., Relloso, M., Vega, M.A., Corbí, A.L., Puig-Kröger, A., 2005. RUNX3  
626 regulates the activity of the CD11a and CD49d integrin gene promoters. *Immunobiology*  
627 210, 133–139. doi:10.1016/j.imbio.2005.05.008
- 628 Donnarumma, T., Young, G.R., Merckenschlager, J., Eksmond, U., Bongard, N., Nutt, S.L., Boyer,  
629 C., Dittmer, U., Le-Trilling, V.T.K., Trilling, M., Bayer, W., Kassiotis, G., 2016. Opposing  
630 Development of Cytotoxic and Follicular Helper CD4 T Cells Controlled by the TCF-1-Bcl6  
631 Nexus. *Cell Reports* 17, 1571–1583. doi:10.1016/j.celrep.2016.10.013
- 632 Fujii, C., Kondo, T., Ochi, H., Okada, Y., Hashi, Y., Adachi, T., Shin-Ya, M., Matsumoto, S.,  
633 Takahashi, R., Nakagawa, M., Mizuno, T., 2016. Altered T cell phenotypes associated with  
634 clinical relapse of multiple sclerosis patients receiving fingolimod therapy. *Sci Rep* 6,  
635 35314. doi:10.1038/srep35314
- 636 Goping, I.S., Barry, M., Liston, P., Sawchuk, T., Constantinescu, G., Michalak, K.M., Shostak, I.,  
637 Roberts, D.L., Hunter, A.M., Korneluk, R., Bleackley, R.C., 2003. Granzyme B-Induced  
638 Apoptosis Requires Both Direct Caspase Activation and Relief of Caspase Inhibition.  
639 *Immunity* 18, 355–365. doi:10.1016/S1074-7613(03)00032-3
- 640 Haile, Y., Carmine-Simmen, K., Olechowski, C., Kerr, B., Bleackley, R.C., Giuliani, F., 2015.  
641 Granzyme B-inhibitor serpin3n induces neuroprotection in vitro and in vivo. *J*  
642 *Neuroinflammation* 12, 157.
- 643 Hamilton, S.E., Jameson, S.C., 2007. CD8+ T Cell Differentiation: Choosing a Path through T-  
644 bet. *Immunity* 27, 180–182. doi:10.1016/j.immuni.2007.08.003
- 645 Hartung, E., Becker, M., Bachem, A., Reeg, N., Jäkel, A., Hutloff, A., Weber, H., Weise, C.,  
646 Giesecke, C., Henn, V., Gurka, S., Anastassiadis, K., Mages, H.W., Kroczeck, R.A., 2015.  
647 Induction of potent CD8 T cell cytotoxicity by specific targeting of antigen to cross-  
648 presenting dendritic cells in vivo via murine or human XCR1. *J. Immunol.* 194, 1069–1079.  
649 doi:10.4049/jimmunol.1401903
- 650 Himmelstein, D.S., Baranzini, S.E., 2015. Heterogeneous Network Edge Prediction: A Data  
651 Integration Approach to Prioritize Disease-Associated Genes. *PLOS Comput Biol* 11,  
652 e1004259. doi:10.1371/journal.pcbi.1004259
- 653 Hirota, K., Duarte, J.H., Veldhoen, M., Hornsby, E., Li, Y., Cua, D.J., Ahlfors, H., Wilhelm, C.,  
654 Tolaini, M., Menzel, U., Garefalaki, A., Potocnik, A.J., Stockinger, B., 2011. Fate mapping  
655 of IL-17-producing T cells in inflammatory responses. *Nat. Immunol.* 12, 255–263.  
656 doi:10.1038/ni.1993

- 657 Hodge, G., Hodge, S., 2016. Steroid Resistant CD8+CD28null NKT-Like Pro-inflammatory  
658 Cytotoxic Cells in Chronic Obstructive Pulmonary Disease. *Front. Immunol.* 7, 617.  
659 doi:10.3389/fimmu.2016.00617
- 660 Irle, C., Beatty, P.G., Mickelson, E.M., Hansen, J.A., 1984. Change in functional phenotype of  
661 cloned human alloreactive cytolytic T cells. *Hum. Immunol.* 11, 183–191.  
662 doi:10.1016/0198-8859(84)90058-2
- 663 Jain, R., Chen, Y., Kanno, Y., Joyce-Shaikh, B., Vahedi, G., Hirahara, K., Blumenschein, W.M.,  
664 Sukumar, S., Haines, C.J., Sadekova, S., McClanahan, T.K., McGeachy, M.J., O'Shea, J.J.,  
665 Cua, D.J., 2016. Interleukin-23-Induced Transcription Factor Blimp-1 Promotes  
666 Pathogenicity of T Helper 17 Cells. *Immunity* 44, 131–142.  
667 doi:10.1016/j.immuni.2015.11.009
- 668 Janas, M.L., Groves, P., Kienzle, N., Kelso, A., 2005. IL-2 Regulates Perforin and Granzyme  
669 Gene Expression in CD8+ T Cells Independently of Its Effects on Survival and Proliferation.  
670 *J. Immunol.* 175, 8003–8010. doi:10.4049/jimmunol.175.12.8003
- 671 Jiang, H., Zhang, S.I., Pernis, B., 1992. Role of CD8+ T cells in murine experimental allergic  
672 encephalomyelitis. *Science* 256, 1213–1215. doi:10.1126/science.256.5060.1213
- 673 Joshi, N.S., Cui, W., Chandele, A., Lee, H.K., Urso, D.R., Hagman, J., Gapin, L., Kaech, S.M.,  
674 2007. Inflammation directs memory precursor and short-lived effector CD8(+) T cell fates  
675 via the graded expression of T-bet transcription factor. *Immunity* 27, 281–295.  
676 doi:10.1016/j.immuni.2007.07.010
- 677 Kebir, H., Kreymborg, K., Ifergan, I., Dodelet-Devillers, A., Cayrol, R., Bernard, M., Giuliani, F.,  
678 Arbour, N., Becher, B., Prat, A., 2007. Human TH17 lymphocytes promote blood-brain  
679 barrier disruption and central nervous system inflammation. *Nat. Med.* 13, 1173–1175.  
680 doi:10.1038/nm1651
- 681 Koh, D.-R., Fung-Leung, W.-P., Ho, A., Gray, D., Acha-Orbea, H., Mak, T.-W., 1992. Less  
682 Mortality but More Relapses in Experimental Allergic Encephalomyelitis in CD8-/- Mice  
683 256, 1210–1213. doi:10.1126/science.256.5060.1210
- 684 Larochelle, C., Metz, I., Lécuyer, M.-A., Terouz, S., Roger, M., Arbour, N., Bruck, W., Prat, A.,  
685 2017. Immunological and pathological characterization of fatal rebound MS activity  
686 following natalizumab withdrawal. *Mult. Scler. J.* 23, 72–81.  
687 doi:10.1177/1352458516641775

- 688 Longhini, A.L.F., Glehn, von, F., Brandão, C.O., de Paula, R.F.O., Pradella, F., Moraes, A.S.,  
689 Farias, A.S., Oliveira, E.C., Quispe-Cabanillas, J.G., Abreu, C.H., Damasceno, A.,  
690 Damasceno, B.P., Balashov, K.E., Santos, L.M.B., 2011. Plasmacytoid dendritic cells are  
691 increased in cerebrospinal fluid of untreated patients during multiple sclerosis relapse. *J*  
692 *Neuroinflammation* 8, 2. doi:10.1186/1742-2094-8-2
- 693 Martinez Gomez, J.M., Croxford, J.L., Yeo, K.P., Angeli, V., Schwarz, H., Gasser, S., 2012.  
694 Development of Experimental Autoimmune Encephalomyelitis Critically Depends on  
695 CD137 Ligand Signaling. *Journal of Neuroscience* 32, 18246–18252.  
696 doi:10.1523/JNEUROSCI.2473-12.2012
- 697 Mohammadzadeh, A., Rad, I.A., Ahmadi-Salmasi, B., 2018. CTLA-4, PD-1 and TIM-3 expression  
698 predominantly downregulated in MS patients. *J Neuimmunol* 323, 105–108.  
699 doi:10.1016/j.jneuroim.2018.08.004
- 700 Nohara, C., Akiba, H., Nakajima, A., Inoue, A., Koh, C.S., Ohshima, H., Yagita, H., Mizuno, Y.,  
701 Okumura, K., 2001. Amelioration of experimental autoimmune encephalomyelitis with  
702 anti-OX40 ligand monoclonal antibody: a critical role for OX40 ligand in migration, but not  
703 development, of pathogenic T cells. *J. Immunol.* 166, 2108–2115.
- 704 Ozdemirli, M., el-Khatib, M., Bastiani, L., Akdeniz, H., Kuchroo, V., Ju, S.T., 1992. The cytotoxic  
705 process of CD4 Th1 clones. *J. Immunol.* 149, 1889–1895.
- 706 Paterson, P.Y., 1960. Transfer of allergic encephalomyelitis in rats by means of lymph node  
707 cells. *J. Exp. Med.* 111, 119–136. doi:10.1084/jem.111.1.119
- 708 Pearce, E.L., Mullen, A.C., Martins, G.A., Krawczyk, C.M., Hutchins, A.S., Zediak, V.P., Banica,  
709 M., DiCioccio, C.B., Gross, D.A., Mao, C.-A., Shen, H., Cereb, N., Yang, S.Y., Lindsten, T.,  
710 Rossant, J., Hunter, C.A., Reiner, S.L., 2003. Control of effector CD8+ T cell function by the  
711 transcription factor Eomesodermin. *Science* 302, 1041–1043.  
712 doi:10.1126/science.1090148
- 713 Peeters, L.M., Vanheusden, M., Somers, V., Van Wijmeersch, B., Stinissen, P., Broux, B.,  
714 Hellings, N., 2017. Cytotoxic CD4+ T Cells Drive Multiple Sclerosis Progression. *Front.*  
715 *Immunol.* 8, 134. doi:10.3389/fimmu.2017.01160
- 716 Polman, C.H., Reingold, S.C., Banwell, B., Clanet, M., Cohen, J.A., Filippi, M., Fujihara, K.,  
717 Havrdova, E., Hutchinson, M., Kappos, L., Lublin, F.D., Montalban, X., O'Connor, P.,  
718 Sandberg-Wollheim, M., Thompson, A.J., Waubant, E., Weinshenker, B., Wolinsky, J.S.,

- 719 2011. Diagnostic criteria for multiple sclerosis: 2010 revisions to the McDonald criteria.  
720 *Ann. Neurol.* 69, 292–302. doi:10.1002/ana.22366
- 721 Quezada, S.A., Simpson, T.R., Peggs, K.S., Merghoub, T., Vider, J., Fan, X., Blasberg, R., Yagita,  
722 H., Muranski, P., Antony, P.A., Restifo, N.P., Allison, J.P., 2010. Tumor-reactive CD4+ T  
723 cells develop cytotoxic activity and eradicate large established melanoma after transfer  
724 into lymphopenic hosts. *J. Exp. Med.* 207, 637–650. doi:10.1084/jem.20091918
- 725 Rivers, T.M., Sprunt, D.H., Berry, G.P., 1933. Observations on attempts to produce acute  
726 disseminated encephalomyelitis in monkeys. *J Exp Med* 58, 39–53.  
727 doi:10.1084/jem.58.1.39
- 728 Saligrama, N., Zhao, F., Sikora, M.J., Serratelli, W.S., Fernandes, R.A., Louis, D.M., Yao, W., Ji,  
729 X., Idoyaga, J., Mahajan, V.B., Steinmetz, L.M., Chien, Y.-H., Hauser, S.L., Oksenberg, J.R.,  
730 Garcia, K.C., Davis, M.M., 2019. Opposing T cell responses in experimental autoimmune  
731 encephalomyelitis. *Nature* 476, 1–7. doi:10.1038/s41586-019-1467-x
- 732 Schafflick, D., Xu, C.A., Hartlehnert, M., Cole, M., Schulte-Mecklenbeck, A., Lautwein, T.,  
733 Wolbert, J., Heming, M., Meuth, S.G., Kuhlmann, T., Gross, C.C., Wiendl, H., Yosef, N.,  
734 Horste, G.M.Z., 2020. Integrated single cell analysis of blood and cerebrospinal fluid  
735 leukocytes in multiple sclerosis. *Nat Comms* 11, 1–14. doi:10.1038/s41467-019-14118-w
- 736 Serroukh, Y., Gu-Trantien, C., Hooshar Kashani, B., Defrance, M., Vu Manh, T.-P., Azouz, A.,  
737 Detavernier, A., Hoyois, A., Das, J., Bizet, M., Pollet, E., Tabbuso, T., Calonne, E., van  
738 Gisbergen, K., Dalod, M., Fuks, F., Goriely, S., Marchant, A., 2018. The transcription factors  
739 Runx3 and ThPOK cross-regulate acquisition of cytotoxic function by human Th1  
740 lymphocytes. *eLife* 7, 224. doi:10.7554/eLife.30496
- 741 Setoguchi, R., Tachibana, M., Naoe, Y., Muroi, S., Akiyama, K., Tezuka, C., Okuda, T., Taniuchi,  
742 I., 2008. Repression of the Transcription Factor Th-POK by Runx Complexes in Cytotoxic T  
743 Cell Development. *Science* 319, 822–825. doi:10.1126/science.1151844
- 744 Stangel, M., Stüve, O., 2014. Multiple sclerosis: Natalizumab to fingolimod—the washout  
745 whitewash. *Nat Rev Neurol* 10, 311–313. doi:10.1038/nrneurol.2014.82
- 746 Steinman, L., Merrill, J.T., McInnes, I.B., Peakman, M., 2012. Optimization of current and  
747 future therapy for autoimmune diseases. *Nat. Med.* 18, 59–65. doi:10.1038/nm.2625
- 748 Steinman, L., Zamvil, S.S., 2006. How to successfully apply animal studies in experimental  
749 allergic encephalomyelitis to research on multiple sclerosis. *Ann. Neurol.* 60, 12–21.  
750 doi:10.1002/ana.20913



- 751 Stražar, M., Žagar, L., Kokošar, J., Tanko, V., Erjavec, A., Poličar, P.G., Starič, A., Demšar, J.,  
752 Shaulsky, G., Menon, V., Lemire, A., Parikh, A., Zupan, B., 2019. scOrange—a tool for hands-  
753 on training of concepts from single-cell data analytics. *Bioinformatics* 35, i4–i12.  
754 doi:10.1093/bioinformatics/btz348
- 755 Sun, D., Wekerle, H., 1986. Ia-restricted encephalitogenic T lymphocytes mediating EAE lyse  
756 autoantigen-presenting astrocytes. *Nature* 320, 70–72. doi:10.1038/320070a0
- 757 Suzuki, H., Duncan, G.S., Takimoto, H., Mak, T.W., 1997. Abnormal Development of Intestinal  
758 Intraepithelial Lymphocytes and Peripheral Natural Killer Cells in Mice Lacking the IL-2  
759 Receptor  $\beta$  Chain. *J. Exp. Med.* 185, 499–506. doi:10.1084/jem.185.3.499
- 760 Śledzińska, A., Vila de Mucha, M., Bergerhoff, K., Hotblack, A., Demane, D.F., Ghorani, E.,  
761 Akarca, A.U., Marzolini, M.A.V., Solomon, I., Vargas, F.A., Pule, M., Ono, M., Seddon, B.,  
762 Kassiotis, G., Ariyan, C.E., Korn, T., Marafioti, T., Lord, G.M., Stauss, H., Jenner, R.G., Peggs,  
763 K.S., Quezada, S.A., 2020. Regulatory T Cells Restrain Interleukin-2- and Blimp-1-  
764 Dependent Acquisition of Cytotoxic Function by CD4+ T Cells. *Immunity* 52, 151–166.e6.  
765 doi:10.1016/j.immuni.2019.12.007
- 766 Takeuchi, A., Badr, M.E.S.G., Miyauchi, K., Ishihara, C., Onishi, R., Guo, Z., Sasaki, Y., Ike, H.,  
767 Takumi, A., Tsuji, N.M., Murakami, Y., Katakai, T., Kubo, M., Saito, T., 2015. CRTAM  
768 determines the CD4+ cytotoxic T lymphocyte lineage. *J. Exp. Med.* 213, 123–138.  
769 doi:10.1084/jem.20150519
- 770 Verdeil, G., Puthier, D., Nguyen, C., Schmitt Verhulst, A.M., Auphan-Anezin, N., 2006. STAT5-  
771 Mediated Signals Sustain a TCR-Initiated Gene Expression Program toward Differentiation  
772 of CD8 T Cell Effectors. *J. Immunol.* 176, 4834–4842. doi:10.4049/jimmunol.176.8.4834
- 773 Wagner, H., Götze, D., Ptschelinzew, L., Röllinghoff, M., 1975. Induction of cytotoxic T  
774 lymphocytes against I-region-coded determinants: in vitro evidence for a third  
775 histocompatibility locus in the mouse. *J. Exp. Med.* 142, 1477–1487.  
776 doi:10.1084/jem.142.6.1477
- 777 Wagner, H., Starzinski-Powitz, A., Jung, H., Röllinghoff, M., 1977. Induction of I region-  
778 restricted hapten-specific cytotoxic T lymphocytes. *J. Immunol.* 119, 1365–1368.
- 779 Wang, D., Diao, H., Getzler, A.J., Rogal, W., Frederick, M.A., Milner, J., Yu, B., Crotty, S.,  
780 Goldrath, A.W., Pipkin, M.E., 2018. The Transcription Factor Runx3 Establishes Chromatin  
781 Accessibility of cis-Regulatory Landscapes that Drive Memory Cytotoxic T Lymphocyte  
782 Formation. *Immunity* 48, 659–674.e6. doi:10.1016/j.immuni.2018.03.028

- 783 Wang, Y., Godec, J., Ben-Aissa, K., Cui, K., Zhao, K., Pucsek, A.B., Lee, Y.K., Weaver, C.T., Yagi,  
784 R., Lazarevic, V., 2014. The transcription factors T-bet and Runx are required for the  
785 ontogeny of pathogenic interferon- $\gamma$ -producing T helper 17 cells. *Immunity* 40, 355–366.  
786 doi:10.1016/j.immuni.2014.01.002
- 787 Yednock, T.A., Cannon, C., Fritz, L.C., Sanchez-Madrid, F., Steinman, L., Karin, N., 1992.  
788 Prevention of experimental autoimmune encephalomyelitis by antibodies against alpha  
789 4 beta 1 integrin. *Nature* 356, 63–66. doi:10.1038/356063a0
- 790 Zhang, Z., Gothe, F., Pennamen, P., James, J.R., McDonald, D., Mata, C.P., Modis, Y., Alazami,  
791 A.M., Acres, M., Haller, W., Bowen, C., Döffinger, R., Sinclair, J., Brothers, S., Zhang, Y.,  
792 Matthews, H.F., Naudion, S., Pelluard, F., Alajlan, H., Yamazaki, Y., Notarangelo, L.D.,  
793 Thaventhiran, J.E., Engelhardt, K.R., Al-Mousa, H., Hambleton, S., Rooryck, C., Smith,  
794 K.G.C., Lenardo, M.J., 2019. Human interleukin-2 receptor  $\beta$  mutations associated with  
795 defects in immunity and peripheral tolerance. *J. Exp. Med.* 216, 1311–1327.  
796 doi:10.1084/jem.20182304
- 797

798 **Supplementary Material**

799

Supplementary Figure 1

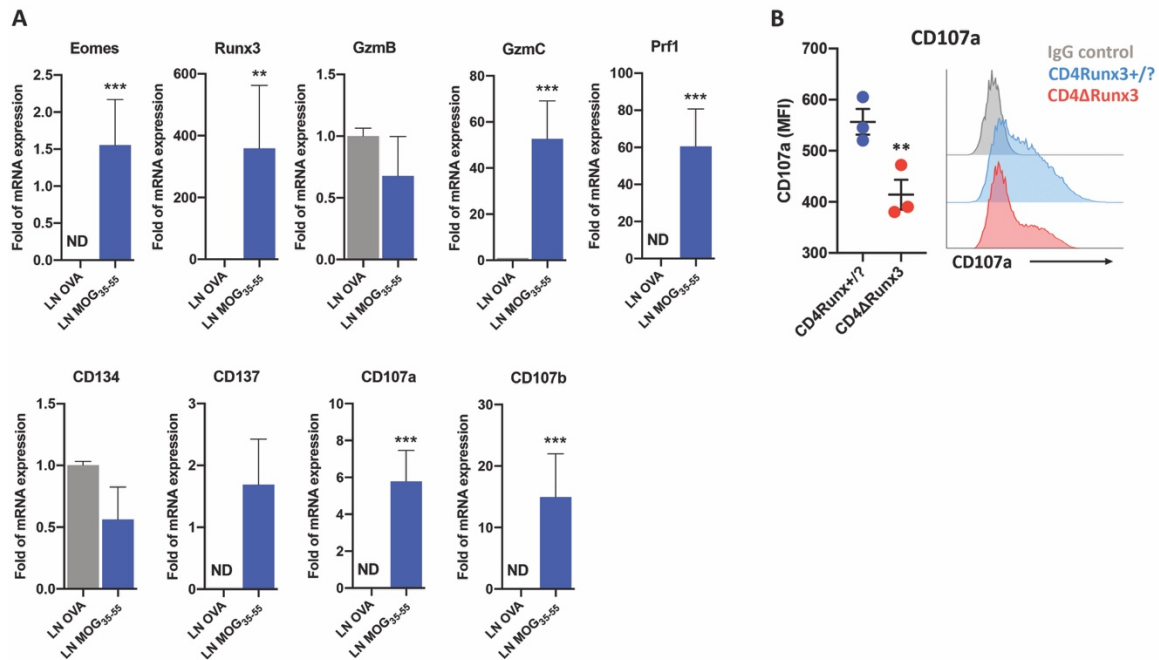

800

801 **Figure S1 – Expression of cytotoxic-related molecules in CD4+ T cells from lymph nodes**

802 **(A)** mRNA expression of cytotoxic-related molecules in CD4+ cells sorted from the lymph

803 nodes of OVA-immunized mice 10 d.a.i. (blue), or lymph nodes of MOG<sub>35-55</sub>-Immunized mice;

804 10 d.a.i. (red) ( $n=3-9$ ). **(B)** CD107a expression (MFI) in CD3+CD4+ cells from CD4Runx3+/?

805 (blue) or CD4ΔRunx3 mice 10 d.a.i. (red). Data are represented in mean +/- SEM; \* $p<0.05$ , \*\* $p<0.01$ ,

806 \*\*\* $p<0.001$ .

807

Supplementary Figure 2

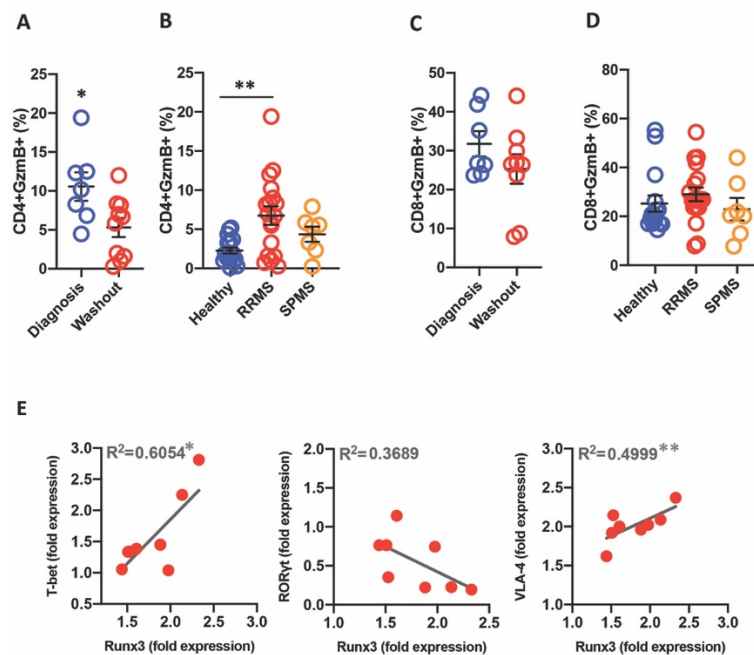

808

809 **Figure S2 – GzmB expression by CD4+ or CD8+ T cells RRMS or SPMS patients**

810 **(A)** GzmB expression in gated CD3+CD4+ cells from PBMCs of untreated RRMS assessed at the  
 811 time of diagnosis (blue) ( $n=8$ ) or untreated RRMS patients assessed at washout period (red)  
 812 ( $n=10$ ). **(B)** GzmB expression in gated CD3+CD4+ cells from PBMCs of HCs (blue) ( $n=17$ ), RRMS  
 813 patients (red) ( $n=18$ ) or SPMS patients (orange) ( $n=7$ ). **(C)** GzmB expression in gated  
 814 CD3+CD8+ cells from PBMCs of untreated RRMS assessed at the time of diagnosis (blue) ( $n=8$ )  
 815 or untreated RRMS patients assessed at washout period (red) ( $n=10$ ). **(D)** GzmB expression  
 816 in gated CD3+CD8+ cells from PBMCs of HCs (blue) ( $n=17$ ), RRMS patients (red) ( $n=18$ ) or  
 817 SPMS patients (orange) ( $n=7$ ). **(E)** Correlation analysis of mRNA expression of T-bet, RORγt or  
 818 VLA-4 with Runx3 in CD3+CD4+ T cells sorted from PBMCs of RRMS patients. Data are  
 819 represented in mean +/- SEM; \* $p<0.05$ , \*\* $p<0.01$

Supplementary Figure 3

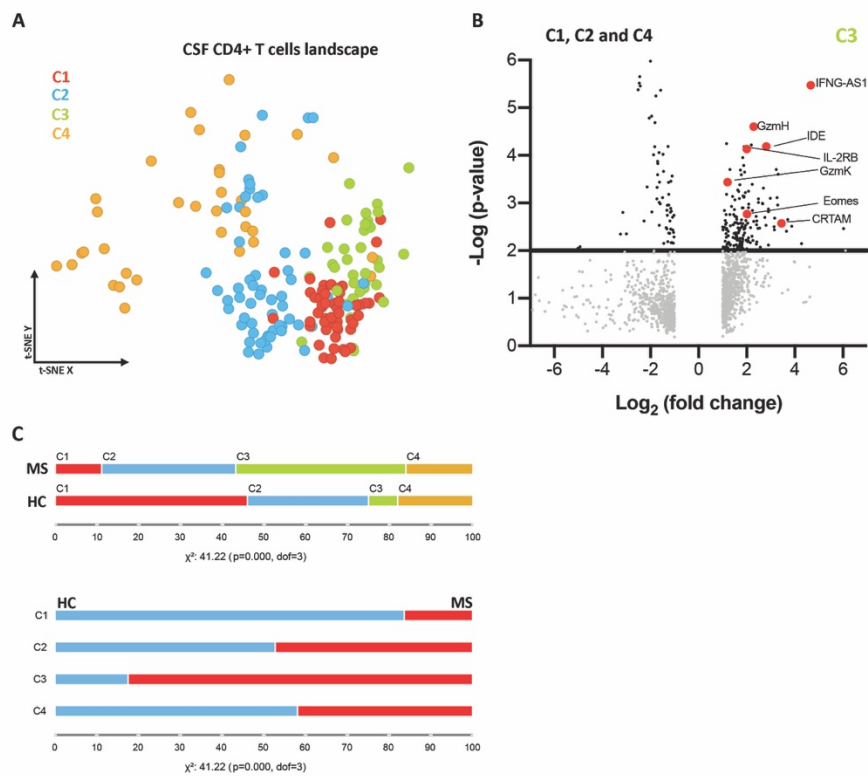

820

821 **Figure S3 – GzmB expression by CD4+ or CD8+ T cells RRMS or SPMS patients**

822 **(A)** Louvain clustering of CD3D+CD4+ subpopulations at the t-SNE-based landscape. **(B)**

823 Volcano plot of global mRNA expression of C3 cluster cell in relation to remaining cells (C1,

824 C2, and C4). **(C)** Frequency of each Louvain cluster in CD3D+CD4+ cells from MS patients or

825 HCs (top). Frequency of CD3D+CD4+ cells from MS patients or HCs in each Louvain cluster

826 (bottom).
